# Supplementary material for: Acid and alkali-resistant Dy4coordination clusters: synthesis, structure and slow magnetic relaxation behaviors
Source: Royal Society of Chemistry journal article supplement (doi:10.1039/d0tc03250f), 2021-01-01
Supplement: d0tc03250f1.pdf [file d0tc03250f1.pdf]

## Electronic Supplementary Information

### **Acid and alkali-resistant Dy<sub>4</sub> coordination clusters: synthesis, structures and slow magnetic relaxation behaviors**

Shui Yu,<sup>a</sup> Huancheng Hu,<sup>\*a</sup> Yunkai Chen,<sup>a</sup> Zilu Chen,<sup>\*a</sup> Zhanyun Zhang,<sup>a</sup> Man-Man Ding,<sup>b</sup> Yi-Quan Zhang,<sup>\*c</sup> Dongcheng Liu,<sup>a</sup> Yuning Liang,<sup>a</sup> Fupei Liang<sup>\*a,c</sup>

<sup>a</sup> State Key Laboratory for Chemistry and Molecular Engineering of Medicinal Resources, School of Chemistry and Pharmaceutical Sciences, Guangxi Normal University, Guilin 541004, P. R. China. E-mail: [siniantongnian@126.com](mailto:siniantongnian@126.com); [zlchen@mailbox.gxnu.edu.cn](mailto:zlchen@mailbox.gxnu.edu.cn); [fliangoffice@yahoo.com](mailto:fliangoffice@yahoo.com)

<sup>b</sup>Jiangsu Key Laboratory for NSLSCS, School of Physical Science and Technology, Nanjing Normal University, Nanjing 210023, P. R. China. E-mail: [zhangyiquan@njnu.edu.cn](mailto:zhangyiquan@njnu.edu.cn)

<sup>c</sup> Guangxi Key Laboratory of Electrochemical and Magnetochemical Functional Materials, College of Chemistry and Bioengineering, Guilin University of Technology, Guilin, 541004, P. R. China. E-mail: [fliangoffice@yahoo.com](mailto:fliangoffice@yahoo.com)

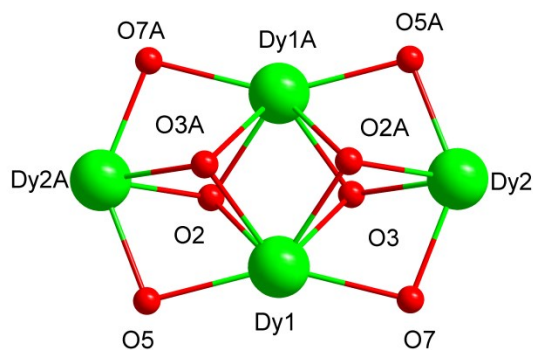

Fig. S1 The tetranuclear skeleton of **1**.

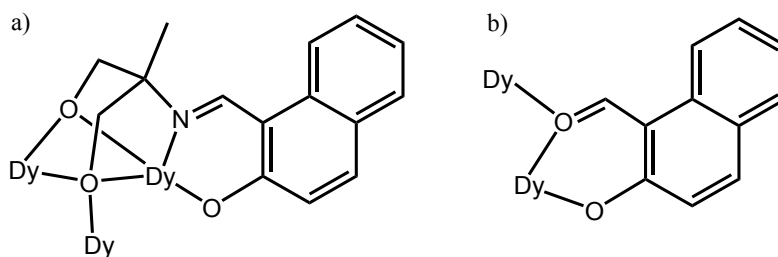

Fig. S2 Different bridging modes of (a)  $(L^1)^{3-}$  and (b)  $(L^2)^-$  in **1**.

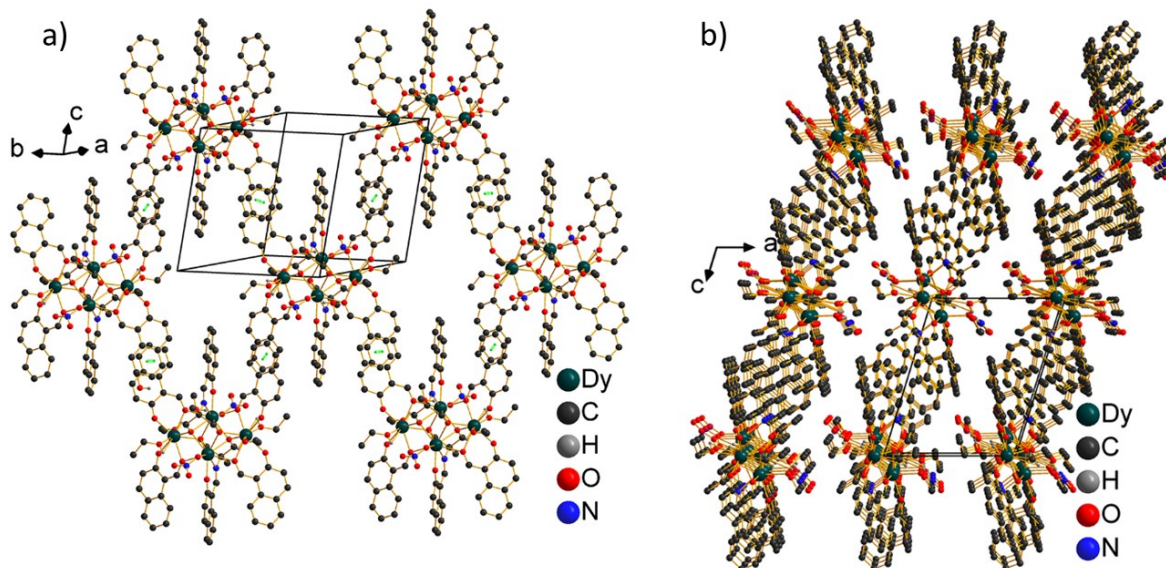

Fig. S3 (a) A 2D supramolecular sheet in the  $(\bar{1}\bar{1}\bar{1})$  plane of **1** formed via the connection of the tetranuclear units through  $\pi\cdots\pi$  stacking interactions (green broken lines) along directions (101) and (011). (b) Packing diagram of **1**. The  $\pi\cdots\pi$  stacking interactions along direction (101) are formed by parallel rings C30-C35 bearing symmetry codes  $(x, y, z)$  and  $(1-x, -y, 1-z)$  with an inter-plane distance of 3.3086(8) Å and a center-to-center distance of 3.8493(8) Å. The  $\pi\cdots\pi$  stacking interactions along direction (011) are formed by parallel rings C19-C24 bearing symmetry codes  $(x, y, z)$  and  $(-x, 1-y, 1-z)$ .

z) with an inter-plane distance of 3.5442(8) Å and a center-to-center distance of 3.8891(8) Å.

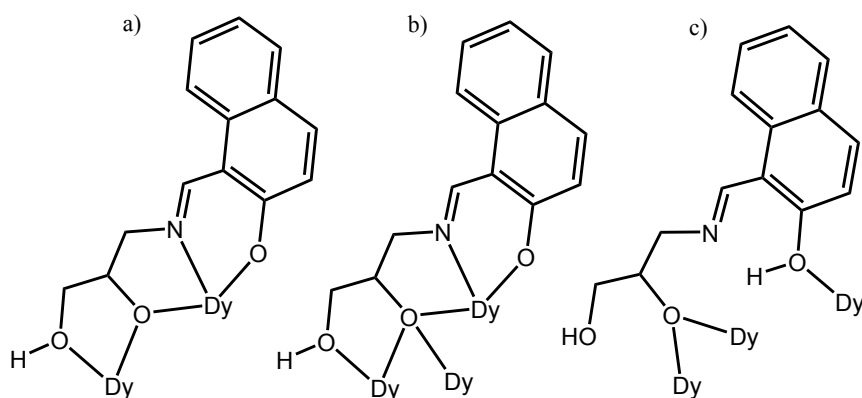

Fig. S4 Different bridging modes of (a and b)  $(HL^3)^{2-}$  and (c)  $(H_2L^3)^-$  in **2**.

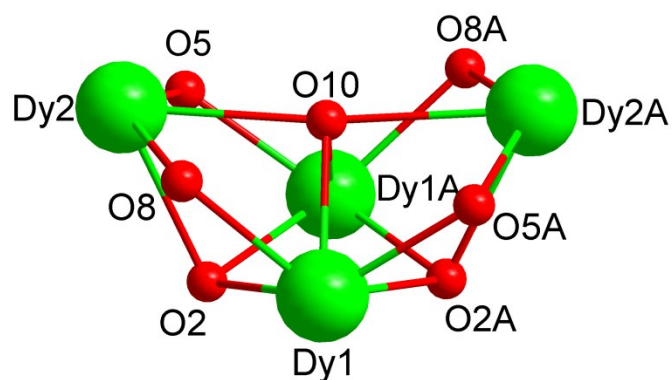

Fig. S5 The tetranuclear skeleton of **2**.

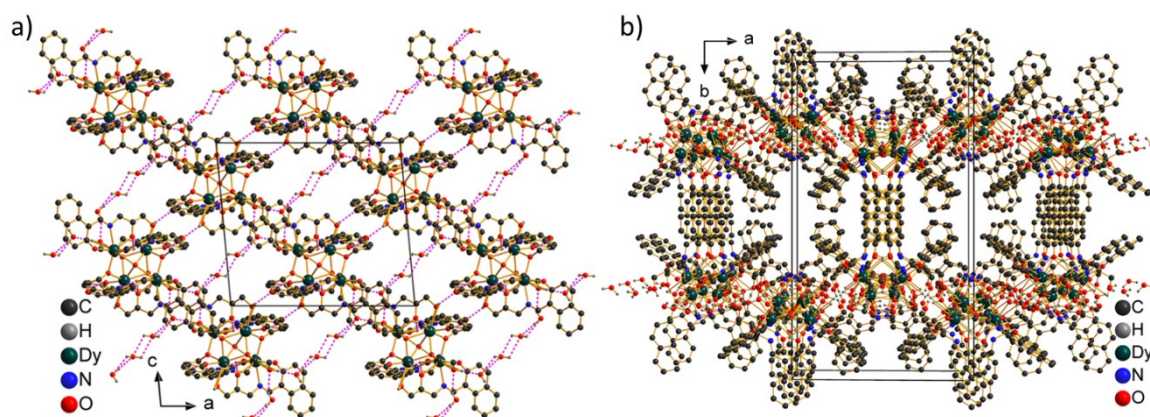

Fig. S6 (a) 2D supramolecular sheet of **2** via the connection of tetranuclear units by lattice water molecules through H-bonds. (b) The stacking diagram of the 2D supramolecular sheets of **2** along axis b. No significant  $\pi \cdots \pi$  stacking interactions were found between the phenyl rings from the adjacent 2D supramolecular sheets.

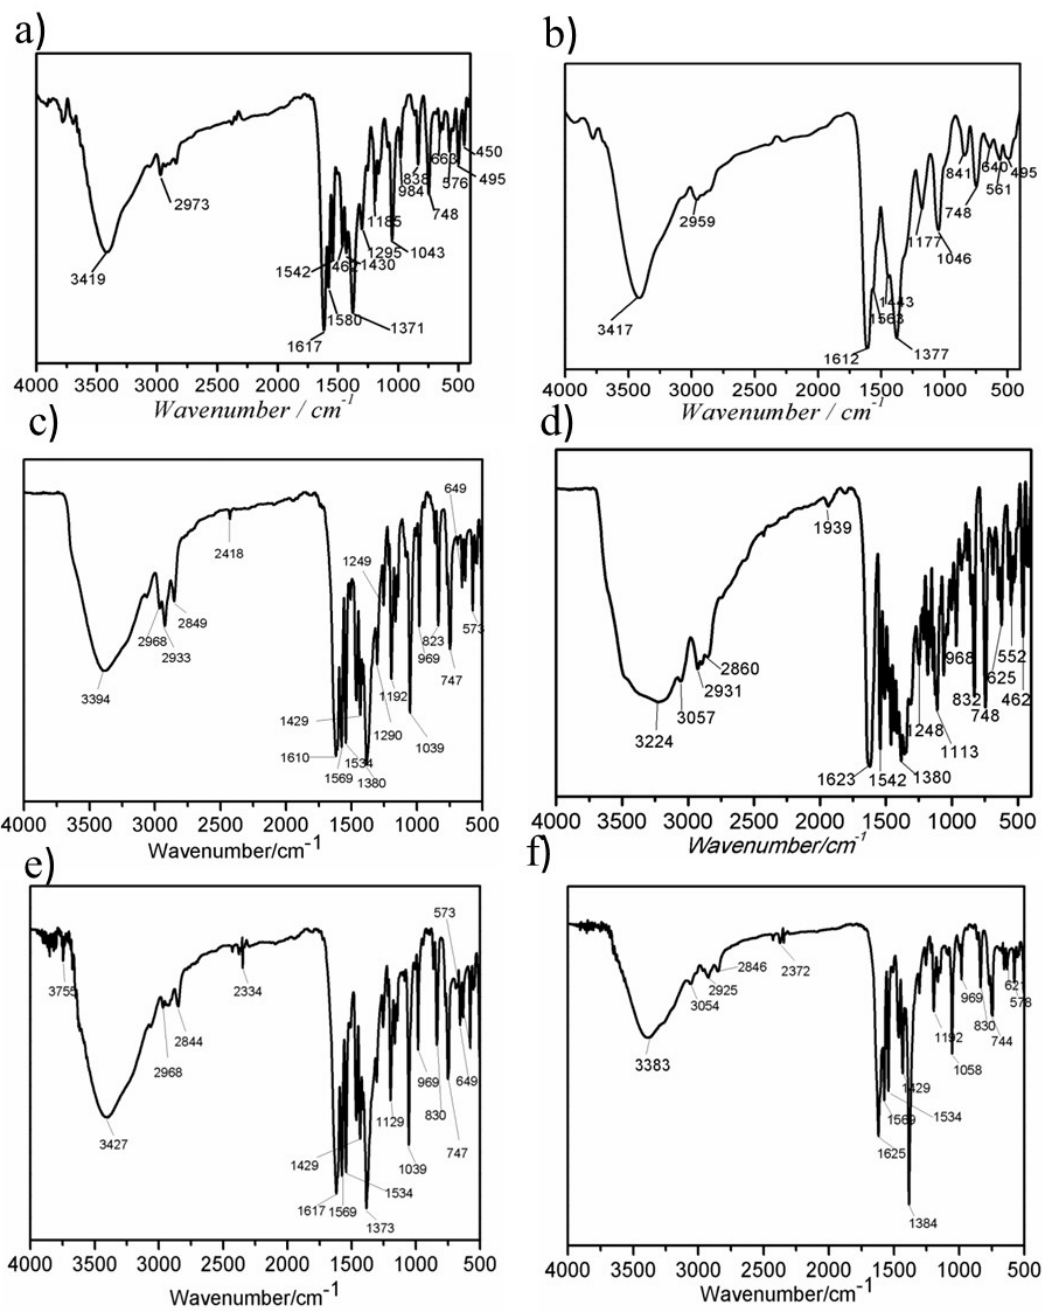

Fig. S7 FT-IR spectrum of (a) 1, (b) 2, (c) 1·Gd<sub>4</sub>, (d) 2·Gd<sub>4</sub>, (e) 1·Dy<sub>0.42</sub>Y<sub>3.58</sub> and (f) 2·Dy<sub>0.27</sub>Y<sub>3.73</sub>.

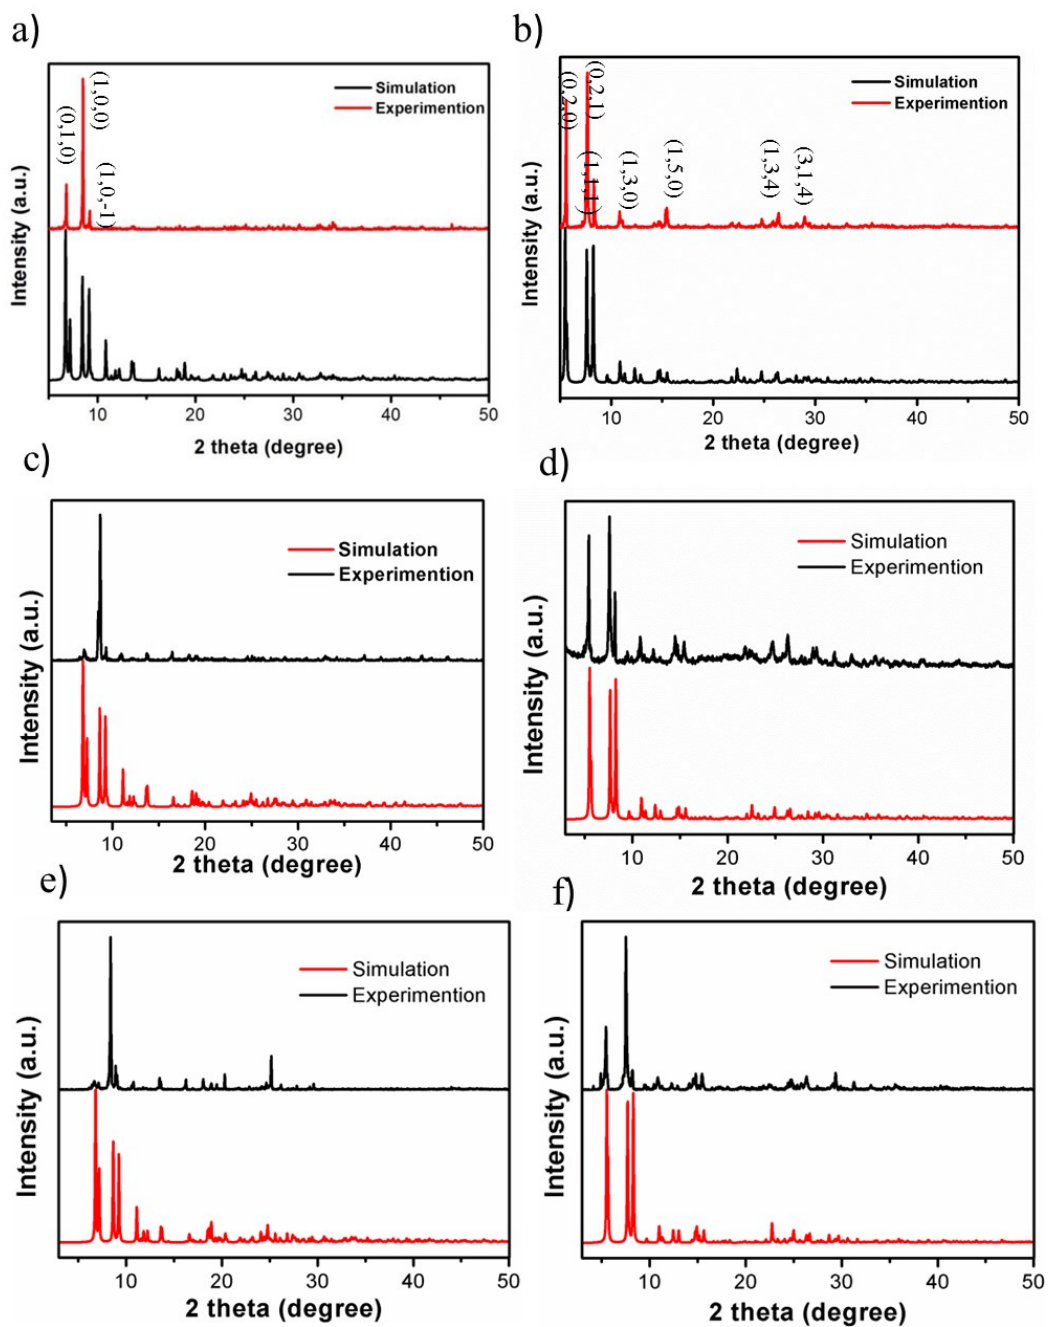

**Fig. S8** The experimental and simulated PXRD patterns of (a) **1**, (b) **2**, (c)  $1 \cdot \text{Gd}_4$ , (d)  $2 \cdot \text{Gd}_4$ , (e)  $1 \cdot \text{Dy}_{0.42}\text{Y}_{3.58}$  and (f)  $2 \cdot \text{Dy}_{0.27}\text{Y}_{3.73}$ .

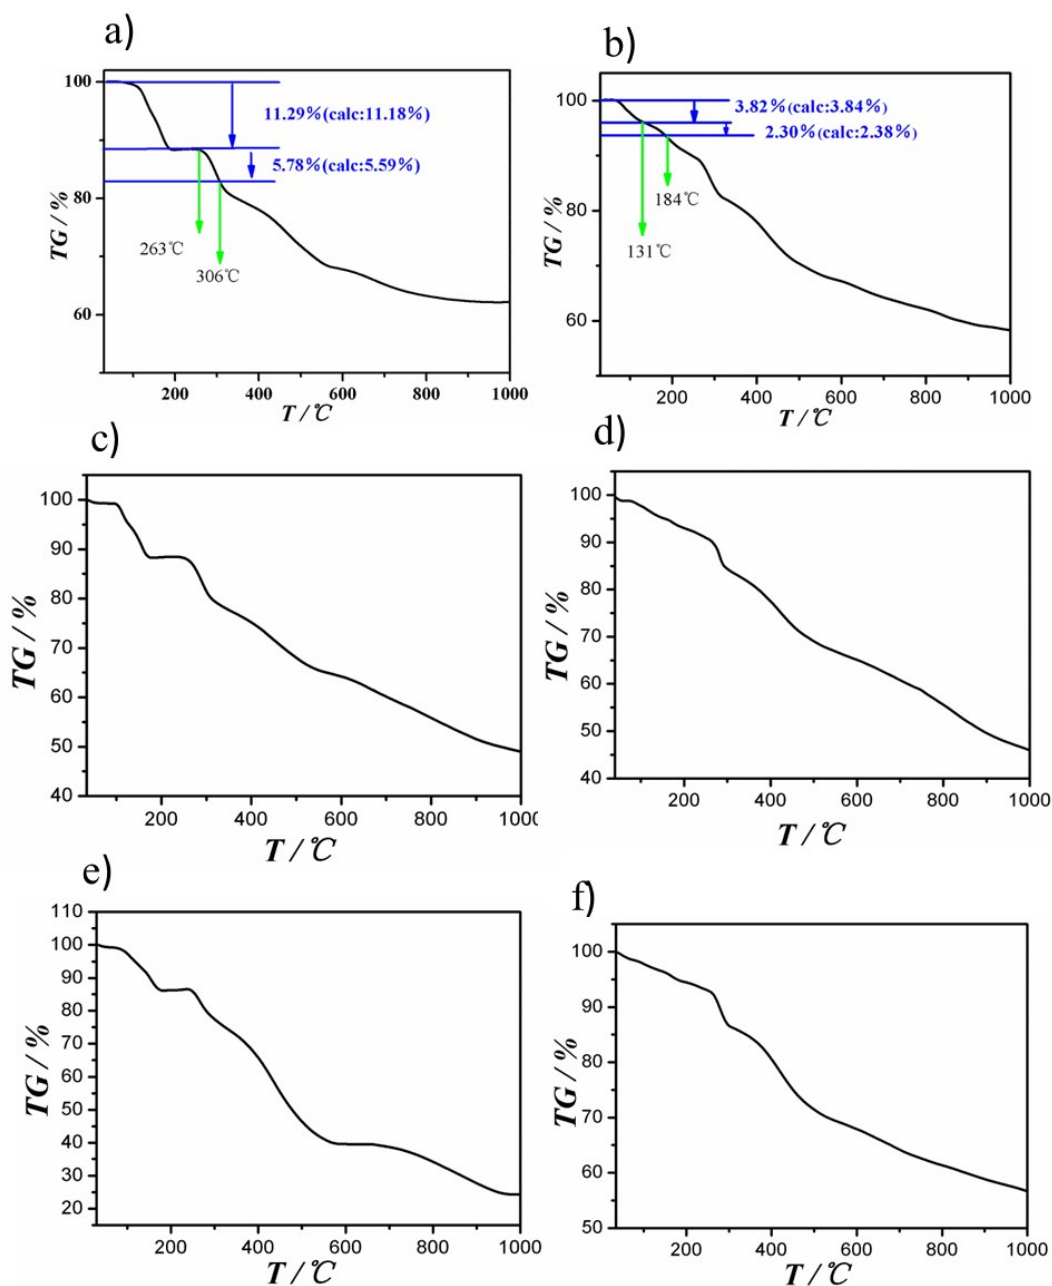

Fig. S9 The TGA curves of (a) **1**, (b) **2**, (c)  $1 \cdot \text{Gd}_4$ , (d)  $2 \cdot \text{Gd}_4$ , (e)  $1 \cdot \text{Dy}_{0.42}\text{Y}_{3.58}$  and (f)  $2 \cdot \text{Dy}_{0.27}\text{Y}_{3.73}$ .

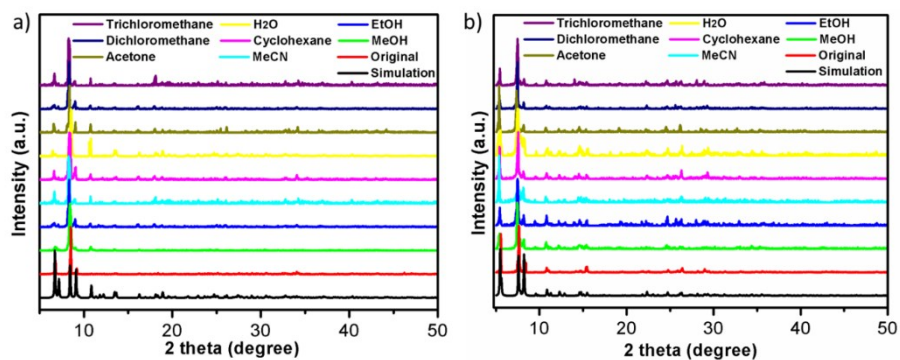

Fig. 10 The PXRD patterns of simulation, as-synthesized samples (a) **1** and (b) **2** after treated in

common solvents for 7 days at room temperature.

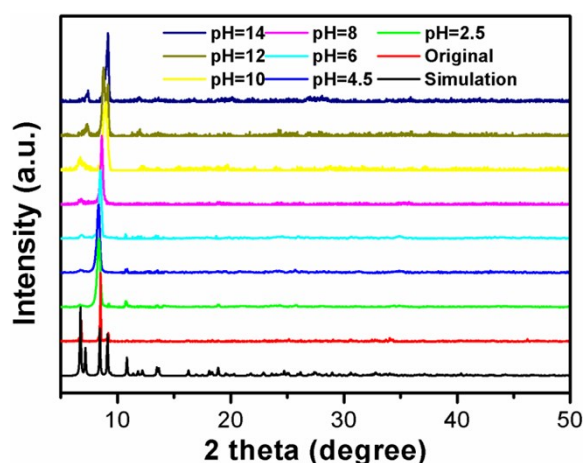

**Fig. 11** The PXRD patterns of simulation, as-synthesized sample and the soaked sample of **1** in different pH values for two days.

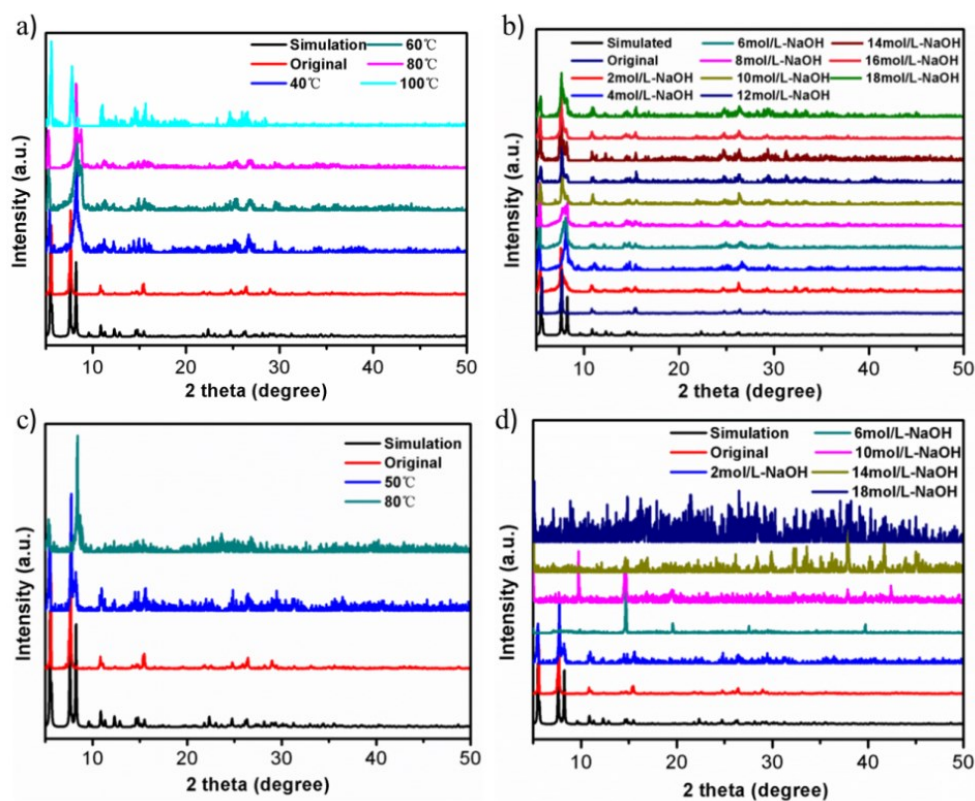

**Fig. S12** The PXRD patterns of simulation, as-synthesized **2** and **2** soaked in (a) water at different temperatures for one day, (b) different concentrations of NaOH aqueous solutions for two days, (c) 2 M NaOH aqueous solution at 50 °C and 80 °C for one day, and (d) different concentrations of NaOH aqueous solutions at 50 °C for one day.

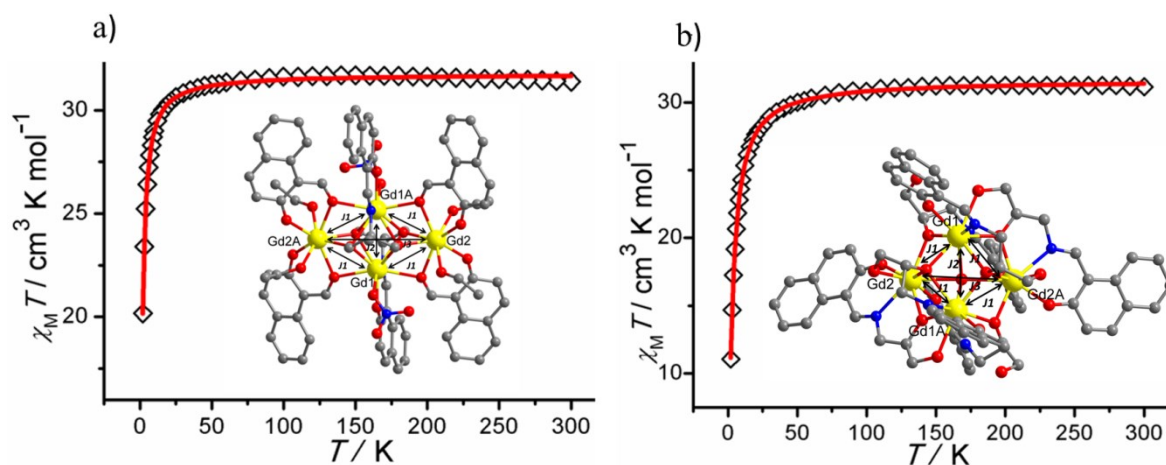

**Fig. S13.**  $\chi_M T$  vs.  $T$  curves for (a)  $1 \cdot \text{Gd}_4$  and (b)  $2 \cdot \text{Gd}_4$  under an applied field of 1000 Oe (red solid lines represent the best fit using PHI program. Inset: Scheme of the  $\text{Gd}^{\text{III}}\text{-Gd}^{\text{III}}$  interactions in compounds  $1 \cdot \text{Gd}_4$  and  $2 \cdot \text{Gd}_4$ ).

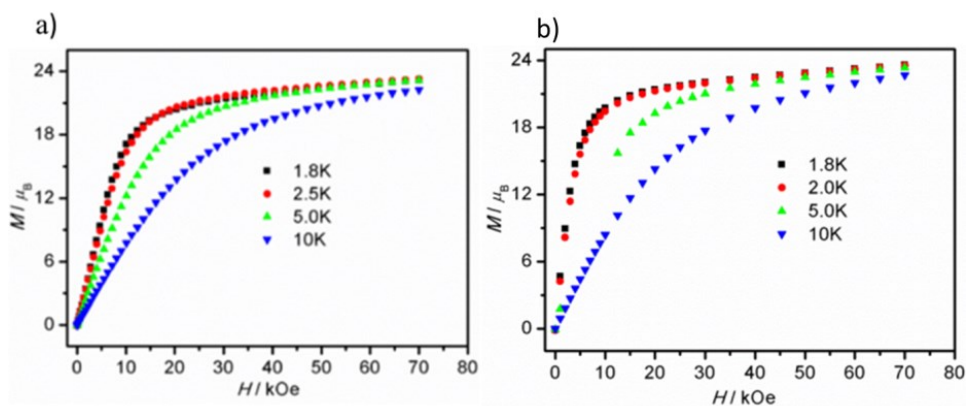

**Fig. S14**  $M$  versus  $H$  plots for (a)  $1$  and (b)  $2$  at different temperatures.

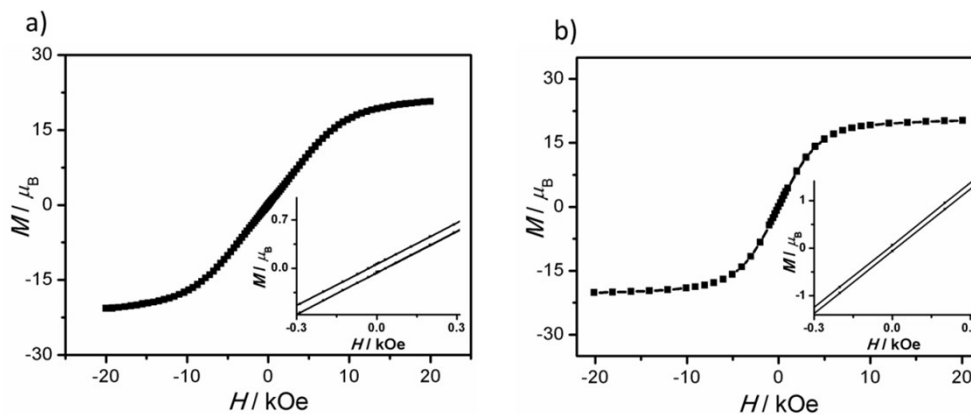

**Fig. S15** Plots of magnetic hysteresis loops for (a)  $1$  and (b)  $2$ .



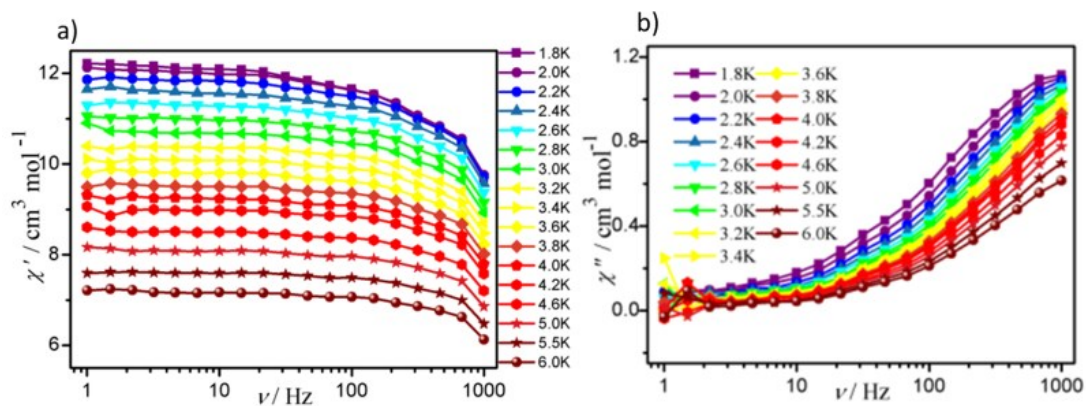

**Fig. S16** Frequency-dependent (a) in-phase ( $\chi'$ ) and (b) out-of-phase ( $\chi''$ ) ac susceptibilities under zero dc field for 1.

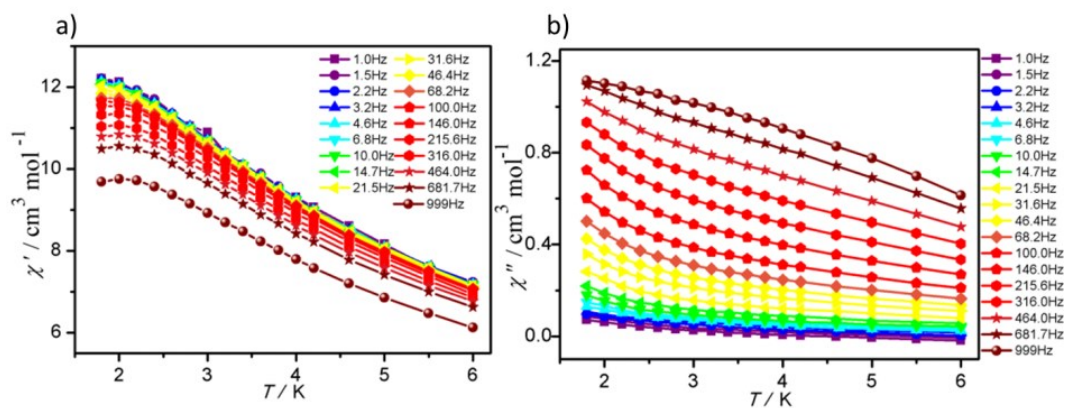

**Fig. S17** Temperature-dependent (a)  $\chi'$  and (b)  $\chi''$  ac susceptibilities under zero dc field for 1.

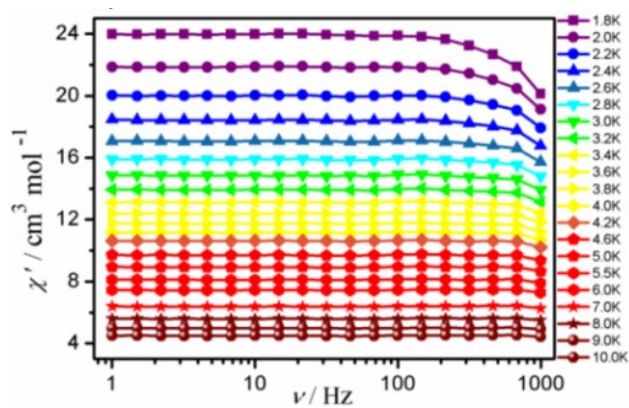

**Fig. S18** Frequency-dependent  $\chi'$  ac susceptibilities under zero dc field for 2.

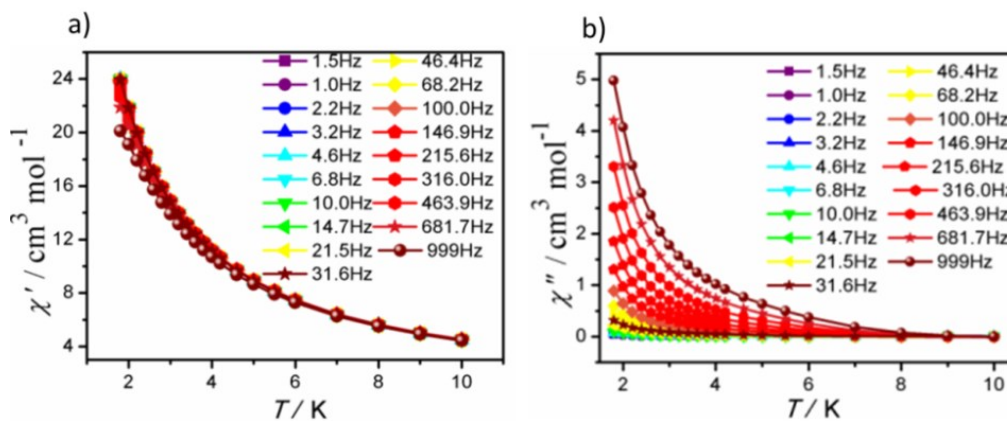

Fig. S19 Temperature-dependent (a)  $\chi'$  and (b)  $\chi''$  ac susceptibilities under zero dc field for **2**.

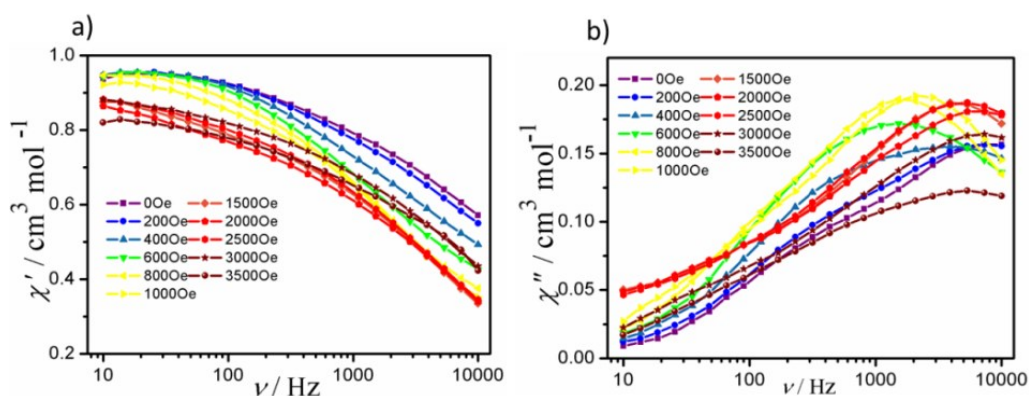

Fig. S20 Frequency-dependent (a)  $\chi'$  and (b)  $\chi''$  ac susceptibilities under different dc fields for **1** at 2 K.

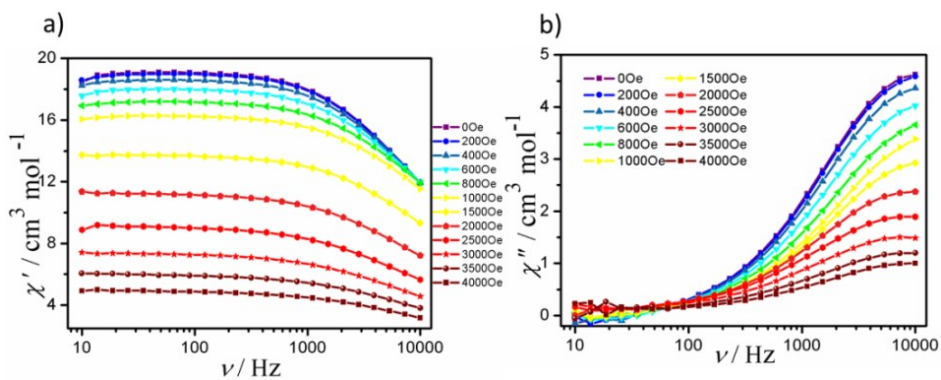

Fig. S21 Frequency-dependent (a)  $\chi'$  and (b)  $\chi''$  ac susceptibilities under different dc fields for **2** at 2 K.

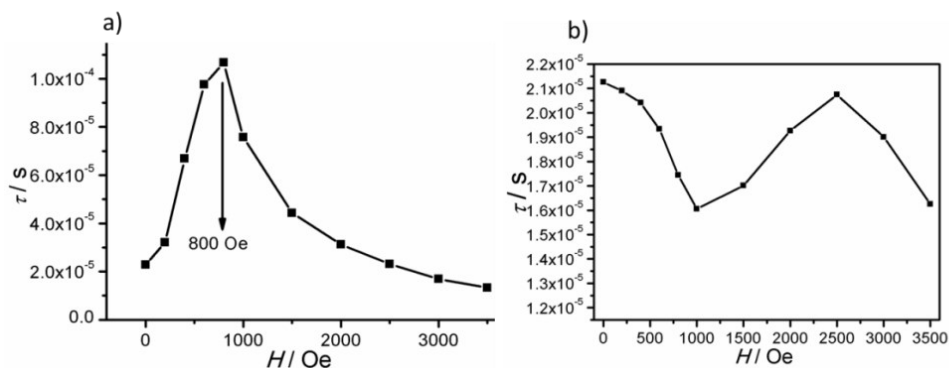

Fig. S22 Plots of the relaxation time  $\tau$  vs.  $H$  for (a) **1** and (b) **2**.

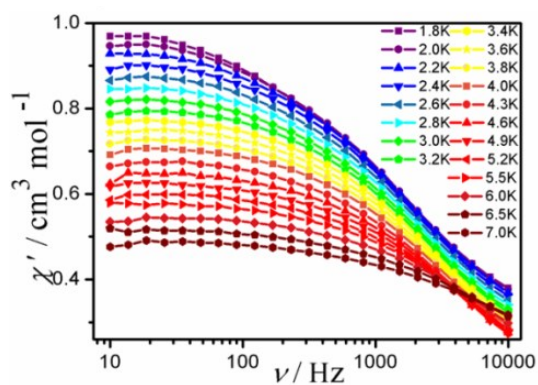

Fig. S23 Frequency-dependent  $\chi'$  ac susceptibilities for **1** under 800 Oe.

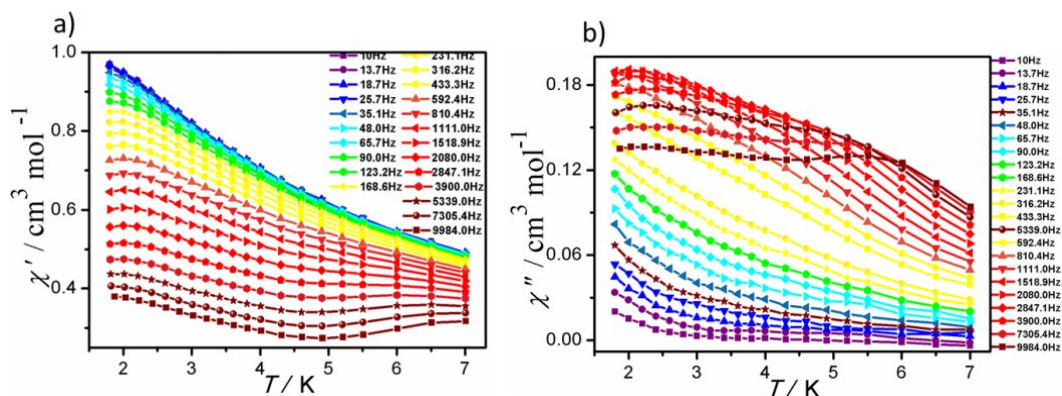

Fig. S24 Temperature-dependent (a)  $\chi'$  and (b)  $\chi''$  ac susceptibilities for **1** under 800 Oe.

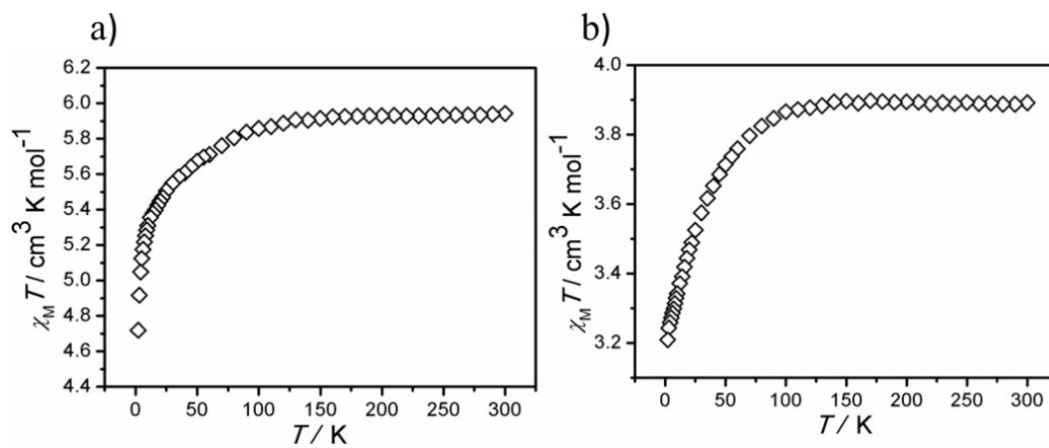

Fig. S25  $\chi_M T$  versus  $T$  curves for (a)  $1 \cdot \text{Dy}_{0.42}\text{Y}_{3.58}$  and (b)  $2 \cdot \text{Dy}_{0.27}\text{Y}_{3.73}$ .

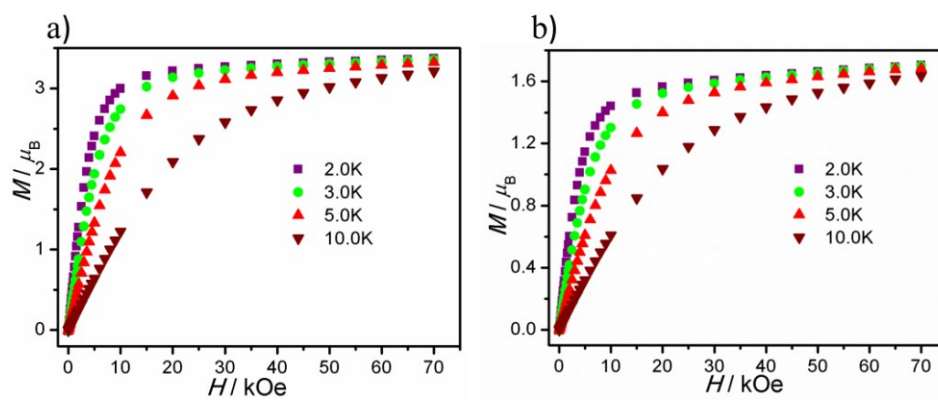

Fig. S26  $M$  versus  $H$  curves for (a)  $1 \cdot \text{Dy}_{0.42}\text{Y}_{3.58}$  and (b)  $2 \cdot \text{Dy}_{0.27}\text{Y}_{3.73}$ .

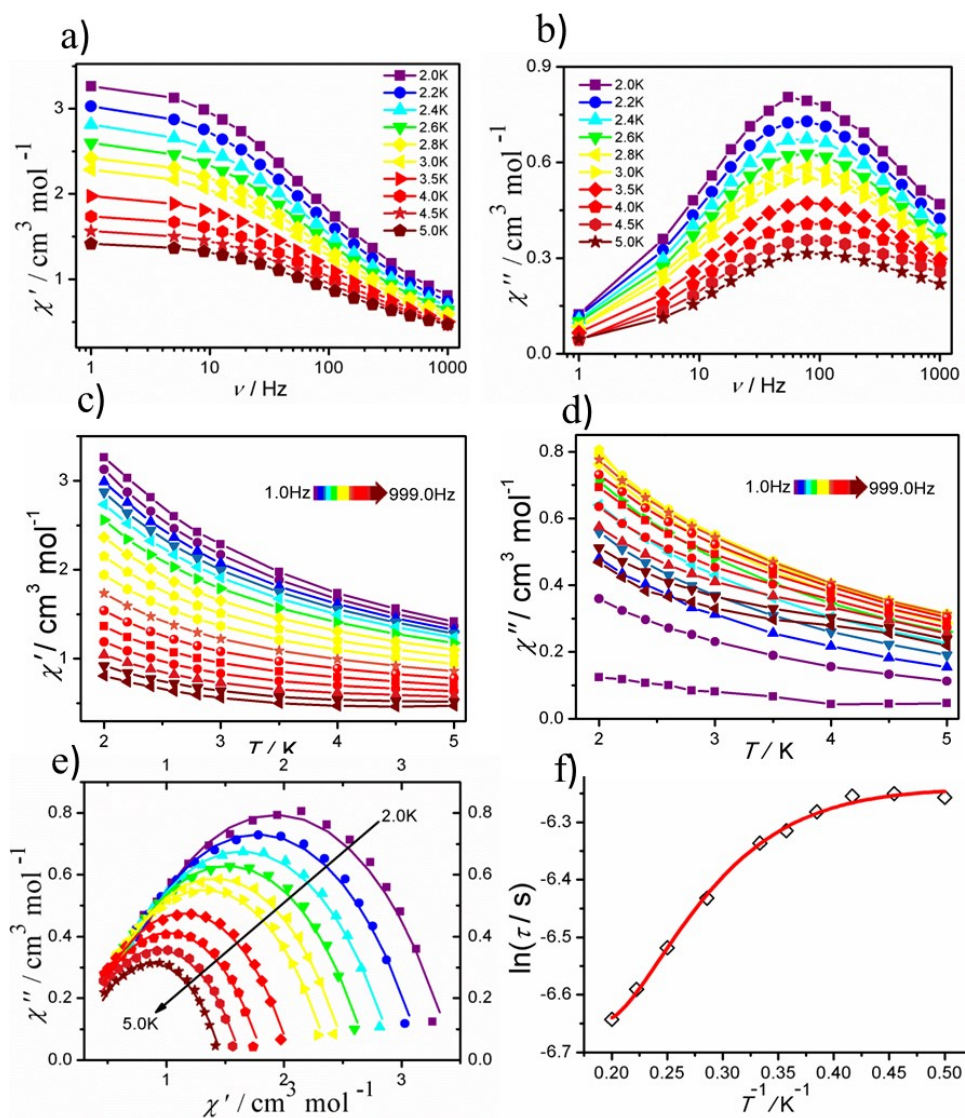

**Fig. S27** Frequency-dependent (a)  $\chi'$  and (b)  $\chi''$  ac susceptibilities, temperature-dependent (c)  $\chi'$  and (d)  $\chi''$  ac susceptibilities, (e) Cole-Cole diagrams with the solid lines representing the best fit to the generalized Debye model and (f) plots of  $\ln(\tau)$  vs.  $T^{-1}$  with solid lines representing the best simulation based on the multiple relaxation pathways for  $1\cdot\text{Dy}_{0.42}\text{Y}_{3.58}$  under zero dc field.

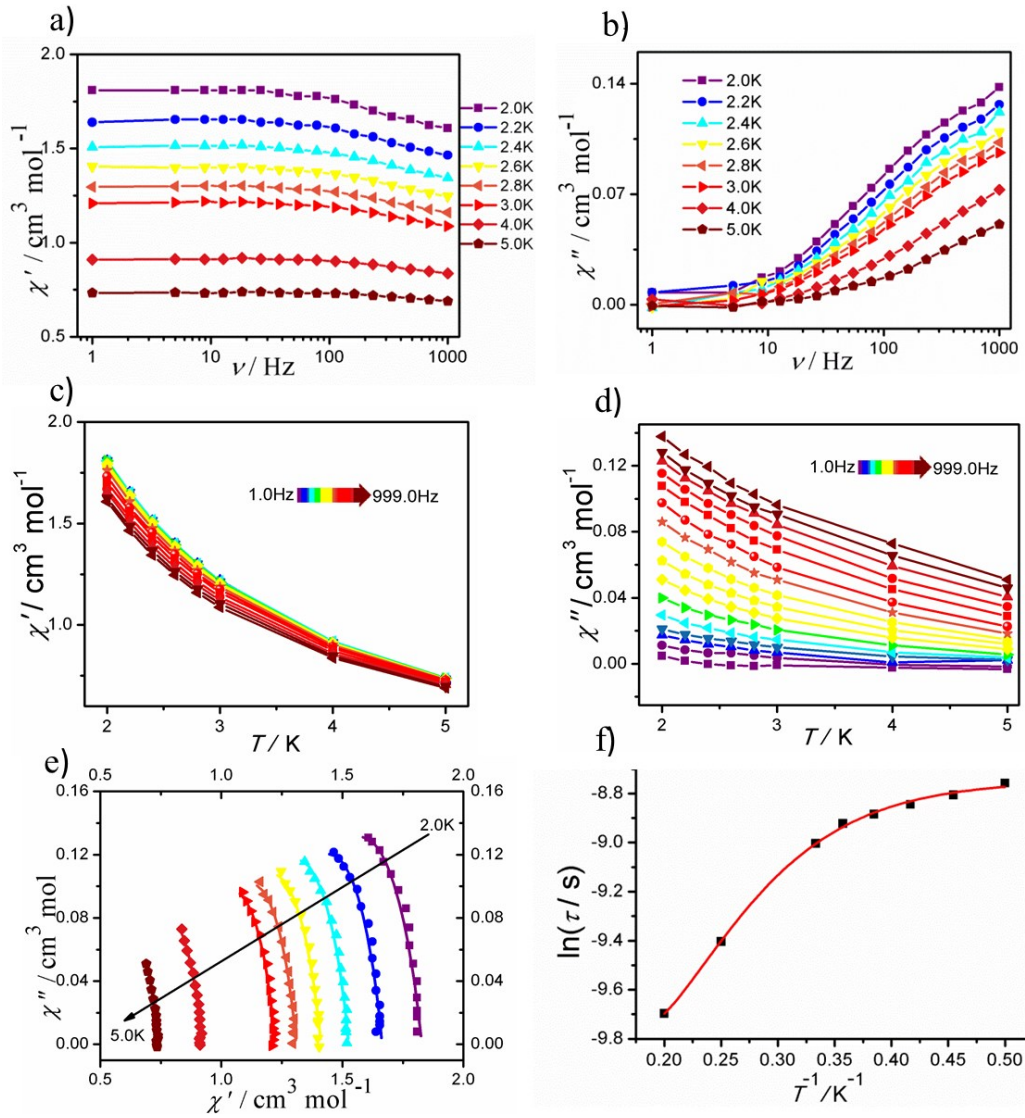

**Fig. S28** Frequency-dependent (a)  $\chi'$  and (b)  $\chi''$  ac susceptibilities, temperature-dependent (c)  $\chi'$  and (d)  $\chi''$  ac susceptibilities, (e) Cole-Cole diagrams with the solid lines representing the best fit to the generalized Debye model and (f) plots of  $\ln(\tau)$  vs.  $T^{-1}$  with solid lines representing the best simulation based on the multiple relaxation pathways for  $2 \cdot \text{Dy}_{0.27}\text{Y}_{3.73}$  under zero dc field.

**Eqn S1 and S2** Equations for a generalized Debye model used for fitting Cole–Cole diagrams

$$\chi_{AC}(\omega) = \chi_s + \frac{\chi_T - \chi_s}{1 + (i\omega\tau)^{(1-\alpha)}}$$

Splitting the above equation into its real and imaginary parts, one obtains:

$$\chi'(\omega) = \chi_s + \frac{(\chi_T - \chi_s)[1 + (\omega\tau)^{1-\alpha} \sin \frac{1}{2}\alpha\pi]}{1 + 2(\omega\tau)^{(1-\alpha)} \sin \frac{1}{2}\alpha\pi + (\omega\tau)^{2(1-\alpha)}} \quad (\text{S1})$$

$$\chi''(\omega) = \frac{(\chi_T - \chi_s)(\omega\tau)^{1-\alpha} \cos \frac{1}{2}\alpha\pi}{1 + 2(\omega\tau)^{(1-\alpha)} \sin \frac{1}{2}\alpha\pi + (\omega\tau)^{2(1-\alpha)}} \quad (\text{S2})$$

**Table S1.** Crystallographic data and structural refinement parameters for **1**, **2**, **1·Gd<sub>4</sub>** and **2·Gd<sub>4</sub>**.

| compound                                  | <b>1</b>                                                                       | <b>2</b>                                                                       | <b>1·Gd<sub>4</sub></b>                                                        | <b>2·Gd<sub>4</sub></b>                                                        |
|-------------------------------------------|--------------------------------------------------------------------------------|--------------------------------------------------------------------------------|--------------------------------------------------------------------------------|--------------------------------------------------------------------------------|
| formula                                   | C <sub>84</sub> H <sub>88</sub> Dy <sub>4</sub> N <sub>4</sub> O <sub>26</sub> | C <sub>88</sub> H <sub>95</sub> Dy <sub>4</sub> N <sub>7</sub> O <sub>23</sub> | C <sub>86</sub> H <sub>92</sub> Gd <sub>4</sub> N <sub>4</sub> O <sub>26</sub> | C <sub>88</sub> H <sub>95</sub> Gd <sub>4</sub> N <sub>7</sub> O <sub>23</sub> |
| fw                                        | 2219.58                                                                        | 2268.70                                                                        | 2226.63                                                                        | 2247.70                                                                        |
| <i>T</i> /K                               | 296.15                                                                         | 296(2)                                                                         | 101.15                                                                         | 173(2)                                                                         |
| $\lambda$ / Å                             | 0.71073                                                                        | 0.71073                                                                        | 0.71073                                                                        | 1.54184                                                                        |
| crystal system                            | triclinic                                                                      | monoclinic                                                                     | triclinic                                                                      | monoclinic                                                                     |
| space group                               | <i>P</i> $\bar{1}$                                                             | <i>C</i> 2/ <i>c</i>                                                           | <i>P</i> $\bar{1}$                                                             | <i>C</i> 2/ <i>c</i>                                                           |
| <i>a</i> / Å                              | 11.094 (3)                                                                     | 17.976(6)                                                                      | 10.89930(10)                                                                   | 18.1829(7)                                                                     |
| <i>b</i> / Å                              | 14.715 (3)                                                                     | 32.213(10)                                                                     | 14.5536(2)                                                                     | 31.9555(8)                                                                     |
| <i>c</i> / Å                              | 14.882 (3)                                                                     | 15.971(5)                                                                      | 14.7744(2)                                                                     | 15.8990(5)                                                                     |
| $\alpha$ / °                              | 112.836 (3)                                                                    | 90.00                                                                          | 112.7460(10)                                                                   | 90                                                                             |
| $\beta$ / °                               | 102.378 (3)                                                                    | 95.254(5)                                                                      | 102.1520(10)                                                                   | 96.130(4)                                                                      |
| $\gamma$ / °                              | 97.985 (3)                                                                     | 90.00                                                                          | 99.4760(10)                                                                    | 90                                                                             |
| <i>V</i> / Å <sup>3</sup>                 | 2119.4 (8)                                                                     | 9209(5)                                                                        | 2032.69(5)                                                                     | 9185.2(5)                                                                      |
| <i>Z</i>                                  | 1                                                                              | 4                                                                              | 1                                                                              | 4                                                                              |
| <i>D<sub>c</sub></i> / g·cm <sup>-3</sup> | 1.739                                                                          | 1.635                                                                          | 1.819                                                                          | 1.625                                                                          |
| $\mu$ / mm <sup>-1</sup>                  | 3.564                                                                          | 3.282                                                                          | 3.304                                                                          | 18.995                                                                         |
| <i>2</i> $\theta$ / °                     | 3.1 to 50.02                                                                   | 3.502 to 50.038                                                                | 3.134 to 50.018                                                                | 5.532 to 157.884                                                               |
| <i>F</i> (000)                            | 1092.0                                                                         | 4480.0                                                                         | 1100.0                                                                         | 4448.0                                                                         |
| reflns collected                          | 22506                                                                          | 36712                                                                          | 40949                                                                          | 32943                                                                          |

|                                   |        |        |        |        |
|-----------------------------------|--------|--------|--------|--------|
| reflns unique                     | 7471   | 8011   | 7162   | 9330   |
| $R_{\text{int}}$                  | 0.0337 | 0.0623 | 0.0362 | 0.0534 |
| GOF on $F^2$                      | 1.108  | 1.074  | 1.037  | 1.030  |
| $R_1$ ( $I > 2\sigma(I)$ )        | 0.0372 | 0.0381 | 0.0241 | 0.0730 |
| $\omega R_2$ ( $I > 2\sigma(I)$ ) | 0.0879 | 0.0920 | 0.0554 | 0.2058 |
| $R_1$ (all data)                  | 0.0471 | 0.0645 | 0.0281 | 0.0883 |
| $\omega R_2$ (all data)           | 0.0974 | 0.1097 | 0.0574 | 0.2216 |

**Table S2.** Selected bond lengths / Å and bond angles / ° for **1**.

|         |           |             |             |             |             |
|---------|-----------|-------------|-------------|-------------|-------------|
| Dy1-O7  | 2.499 (4) | O4A-Dy2-O3  | 144.24 (16) | O4A-Dy2-O2A | 108.30 (17) |
| Dy1-O3  | 2.565 (4) | O4A-Dy2-O5A | 71.57 (16)  | O2-Dy1-O7   | 125.81 (14) |
| Dy1-O3A | 2.404 (4) | O3A-Dy1-O7  | 138.38 (14) | O2A-Dy1-O7  | 71.97 (14)  |
| Dy1-O5  | 2.512 (4) | O3A-Dy1-O3  | 94.47 (13)  | O2A-Dy1-O3  | 58.94 (13)  |
| Dy1-N1  | 2.425 (5) | O3A-Dy1-O5  | 70.35 (14)  | O2-Dy1-O3   | 62.84 (13)  |
| Dy1-O8  | 2.431 (5) | O3A-Dy1-N1  | 129.69(15)  | O2A-Dy1-O5  | 136.80 (14) |
| Dy1-O2A | 2.406 (4) | O3A-Dy1-O8  | 78.55(15)   | O2-Dy1-O5   | 66.03 (14)  |
| Dy1-O2  | 2.490 (4) | O3A-Dy1-O2A | 66.47(14)   | O2A-Dy1-N1  | 127.15 (15) |
| Dy1-O1  | 2.230 (4) | O3A-Dy1-O2  | 60.04 (13)  | O2A-Dy1-O8  | 80.34 (16)  |



|            |             |             |             |             |             |
|------------|-------------|-------------|-------------|-------------|-------------|
| Dy2-O6     | 2.248 (5)   | O5-Dy1-O3   | 127.20(14)  | O2A-Dy1-O2  | 92.82 (13)  |
| Dy2-O7     | 2.404 (4)   | N1-Dy1-O7   | 78.52 (15)  | O1-Dy1-O7   | 78.77 (15)  |
| Dy2-O3     | 2.331 (4)   | N1-Dy1-O3   | 69.10 (15)  | O1-Dy1-O3   | 131.15 (14) |
| Dy2-O5A    | 2.426 (4)   | N1-Dy1-O5   | 82.54 (16)  | O1-Dy1-O3A  | 133.73 (15) |
| Dy2-O11    | 2.430 (5)   | N1-Dy1-O8   | 144.67 (16) | O1-Dy1-O5   | 74.73 (15)  |
| Dy2-O12    | 2.414 (6)   | N1-Dy1-O2   | 70.45 (14)  | O1-Dy1-N1   | 72.59 (16)  |
| Dy2-O2A    | 2.331 (4)   | O8-Dy1-O7   | 92.66 (16)  | O1-Dy1-O8   | 72.14 (16)  |
| Dy2-O4A    | 2.254 (5)   | O8-Dy1-O3   | 137.46 (16) | O1-Dy1-O2   | 128.47 (14) |
| Dy1...Dy1A | 3.5877(10)  | O8-Dy1-O5   | 90.23 (17)  | O1-Dy1-O2A  | 138.47 (15) |
| Dy1...Dy2  | 3.5859(9)   | O8-Dy1-O2   | 136.85 (15) | O7-Dy1-O5   | 151.03 (14) |
| Dy2...Dy2A | 5.0410(10)  | O7-Dy1-O3   | 64.98 (14)  | O3-Dy2-O7   | 70.13 (14)  |
| O6-Dy2-O7  | 71.80 (16)  | O7-Dy2-O5A  | 137.45 (14) | O3-Dy2-O5A  | 73.08 (14)  |
| O6-Dy2-O3  | 114.46 (17) | O7-Dy2-O11  | 70.41 (16)  | O3-Dy2-O11  | 129.03 (16) |
| O6-Dy2-O5A | 145.34 (17) | O7-Dy2-O12  | 118.31 (18) | O3-Dy2-O12  | 79.66 (17)  |
| O6-Dy2-O11 | 81.6 (2)    | O5A-Dy2-O11 | 121.36(17)  | O3-Dy2-O2A  | 63.38 (14)  |
| O6-Dy2-O12 | 74.26 (19)  | O12-Dy2-O5A | 74.16 (18)  | O2A-Dy2-O7  | 74.98 (14)  |
| O6-Dy2-O2A | 144.65 (16) | O12-Dy2-O11 | 148.92 (19) | O2A-Dy2-O5A | 69.87 (15)  |
| O6-Dy2-O4A | 92.19 (19)  | O4A-Dy2-O11 | 75.87 (18)  | O2A-Dy2-O11 | 76.20 (17)  |
| O4A-Dy2-O7 | 144.28 (16) | O4A-Dy2-O12 | 85.7 (2)    | O2A-Dy2-O12 | 134.10 (16) |

Symmetry codes: (A)  $-x, -y, -z$ .

**Table S3.** Selected bond lengths / Å and bond angles / ° for **2**.

|         |           |             |             |            |             |
|---------|-----------|-------------|-------------|------------|-------------|
| Dy1-O5A | 2.254 (4) | O5A-Dy1-N1A | 96.82 (18)  | O5-Dy2-O3  | 94.73 (18)  |
| Dy1-O1A | 2.266 (4) | O1A-Dy1-N1A | 72.64 (17)  | O7A-Dy2-O3 | 160.15 (18) |
| Dy1-O8  | 2.336 (4) | O8-Dy1-N1A  | 157.06 (17) | O8-Dy2-O3  | 97.36 (18)  |

|             |             |             |             |             |             |
|-------------|-------------|-------------|-------------|-------------|-------------|
| Dy1-O2      | 2.342 (4)   | O2-Dy1-N1A  | 99.35 (18)  | O4-Dy2-O2   | 139.86 (17) |
| Dy1-O10     | 2.446 (4)   | O10-Dy1-N1A | 129.52 (16) | O5-Dy2-O2   | 72.99 (15)  |
| Dy1-N1A     | 2.471 (5)   | O5A-Dy1-O2A | 73.17 (14)  | O7A-Dy2-O2  | 128.49 (16) |
| Dy1-O2A     | 2.472 (4)   | O1A-Dy1-O2A | 131.30 (15) | O8-Dy2-O2   | 75.24 (13)  |
| Dy1-O6A     | 2.484 (5)   | O8-Dy1-O2A  | 132.17 (14) | O3-Dy2-O2   | 66.24 (15)  |
| Dy2-O4      | 2.225 (5)   | O2-Dy1-O2A  | 75.75 (16)  | O4-Dy2-N2   | 71.02 (18)  |
| Dy2-O5      | 2.263 (4)   | O5A-Dy1-N1A | 96.82 (18)  | O5-Dy2-N2   | 68.05 (17)  |
| Dy2-O7A     | 2.329 (5)   | O1A-Dy1-N1A | 72.64 (17)  | O7A-Dy2-N2  | 83.5 (2)    |
| Dy2-O8      | 2.331 (4)   | O8-Dy1-N1A  | 157.06 (17) | O8-Dy2-N2   | 154.27 (17) |
| Dy2-O3      | 2.410 (5)   | O2-Dy1-N1A  | 99.35 (18)  | O3-Dy2-N2   | 76.7 (2)    |
| Dy2-O2      | 2.474 (4)   | O10-Dy1-N1A | 129.52 (16) | O2-Dy2-N2   | 122.65 (18) |
| Dy2-N2      | 2.510 (6)   | O5A-Dy1-O2A | 73.17 (14)  | O4-Dy2-O10  | 139.36 (17) |
| Dy2-O10     | 2.5255 (7)  | O1A-Dy1-O2A | 131.30 (15) | O5-Dy2-O10  | 71.69 (12)  |
| Dy1...Dy1A  | 3.6811 (10) | O8-Dy1-O2A  | 132.17 (14) | O7A-Dy2-O10 | 68.82 (17)  |
| Dy1...Dy2   | 3.5859 (9)  | O2-Dy1-O2A  | 75.75 (16)  | O8-Dy2-O10  | 68.85 (11)  |
| Dy2...Dy2A  | 5.0410(10)  | O4-Dy2-O5   | 138.25 (16) | O3-Dy2-O10  | 127.72 (17) |
| O1A-Dy1-O2  | 85.14 (15)  | O4-Dy2-O7A  | 88.02 (18)  | O2-Dy2-O10  | 61.50 (15)  |
| O8-Dy1-O2   | 77.73 (14)  | O5-Dy2-O7A  | 79.65 (17)  | N2-Dy2-O10  | 134.39 (14) |
| O5A-Dy1-O10 | 73.36 (12)  | O4-Dy2-O8   | 83.51 (16)  | O2-Dy1-O10  | 64.50 (12)  |
| O1A-Dy1-O10 | 143.44 (12) | O5-Dy2-O8   | 137.67 (15) | O4-Dy2-O3   | 83.60 (19)  |
| O8-Dy1-O10  | 70.16 (12)  | O7A-Dy2-O8  | 99.54 (16)  |             |             |

Symmetry codes: (A)  $-x+1, y, -z+1/2$ .

**Table S4.** Selected bond lengths / Å and bond angles / ° for **1·Gd<sub>4</sub>**.

|            |            |             |            |             |            |
|------------|------------|-------------|------------|-------------|------------|
| Gd1-O1     | 2.227 (2)  | O1-Gd1-N1   | 72.56 (9)  | O2A-Gd1-N1  | 127.07 (9) |
| Gd1-N1     | 2.420 (3)  | O1-Gd1-O2A  | 138.24 (8) | O2A-Gd1-O2  | 92.59 (7)  |
| Gd1-O2A    | 2.392 (2)  | O1-Gd1-O2   | 128.91 (8) | O2-Gd1-O3   | 62.61 (7)  |
| Gd1-O2     | 2.474 (2)  | O1-Gd1-O3A  | 133.23 (8) | O2A-Gd1-O3  | 58.71 (7)  |
| Gd1-O3A    | 2.384 (2)  | O1-Gd1-O3   | 131.32 (8) | O2-Gd1-O5A  | 65.33 (8)  |
| Gd1-O3     | 2.584 (2)  | O1-Gd1-O5A  | 75.10 (8)  | O2A-Gd1-O5A | 137.46 (8) |
| Gd1-O5A    | 2.516 (2)  | O1-Gd1-O7   | 78.59 (8)  | O2A-Gd1-O7  | 72.13 (8)  |
| Gd1-O7     | 2.491 (2)  | O1-Gd1-O8   | 72.37 (8)  | O2-Gd1-O7   | 125.37 (8) |
| Gd1-O8     | 2.431 (2)  | N1-Gd1-O2   | 70.78 (9)  | O2A-Gd1-O8  | 80.09 (8)  |
| Gd2-O2A    | 2.331 (2)  | N1-Gd1-O3   | 69.32 (8)  | O3A-Gd1-N1  | 130.25 (9) |
| Gd2-O3     | 2.325 (2)  | N1-Gd1-O5A  | 81.39 (9)  | O3A-Gd1-O2  | 60.40 (8)  |
| Gd2-O4     | 2.240 (2)  | N1-Gd1-O7   | 77.91 (9)  | O3A-Gd1-O2A | 66.82 (8)  |
| Gd2-O5     | 2.412 (2)  | N1-Gd1-O8   | 144.86 (9) | O3A-Gd1-O3  | 94.89 (7)  |
| Gd2-O6     | 2.249 (2)  | O5A-Gd1-O3  | 126.03 (8) | O3A-Gd1-O5A | 70.64 (8)  |
| Gd2-O7     | 2.400 (2)  | O7-Gd1-O3   | 64.87 (8)  | O3A-Gd1-O7  | 138.88 (8) |
| Gd2-O12    | 2.401 (3)  | O7-Gd1-O5A  | 150.37 (7) | O3A-Gd1-O8  | 77.76 (8)  |
| Gd2-O11    | 2.425 (2)  | O2A-Gd2-O5  | 69.17 (8)  | O3-Gd2-O2A  | 63.37 (8)  |
| O8-Gd1-O2  | 136.64 (8) | O2A-Gd2-O7  | 74.87 (8)  | O3-Gd2-O5   | 73.48 (8)  |
| O8-Gd1-O3  | 137.10 (8) | O2A-Gd2-O12 | 133.29 (9) | O3-Gd2-O7   | 70.37 (8)  |
| O8-Gd1-O5A | 91.71 (8)  | O2A-Gd2-O11 | 75.37 (8)  | O3-Gd2-O12  | 78.84 (9)  |
| O8-Gd1-O7  | 93.13 (8)  | O5-Gd2-O11  | 119.72 (8) | O3-Gd2-O11  | 128.48 (8) |
| O4-Gd2-O2A | 108.47 (9) | O6-Gd2-O2A  | 145.15 (9) | O7-Gd2-O5   | 137.38 (8) |
| O4-Gd2-O3  | 144.75 (9) | O6-Gd2-O3   | 114.72 (9) | O7-Gd2-O12  | 118.39 (9) |
| O4-Gd2-O5  | 71.77 (8)  | O6-Gd2-O5   | 145.61 (9) | O7-Gd2-O11  | 70.13 (8)  |
| O4-Gd2-O6  | 91.39 (9)  | O6-Gd2-O7   | 72.36 (8)  | O12-Gd2-O5  | 74.71 (9)  |
| O4-Gd2-O7  | 143.52 (9) | O6-Gd2-O12  | 74.51 (9)  | O12-Gd2-O11 | 150.55 (9) |
| O4-Gd2-O12 | 86.48 (9)  | O6-Gd2-O11  | 82.61 (9)  | O4-Gd2-O11  | 75.63 (9)  |

Symmetry codes: (A)  $-x, -y, -z$ .

**Table S5.** Selected bond lengths / Å and bond angles / ° for **2·Gd<sub>4</sub>**.

|             |             |             |             |            |            |
|-------------|-------------|-------------|-------------|------------|------------|
| Gd1-O5A     | 2.283 (6)   | O1A-Gd1-O2A | 130.93 (19) | O4-Gd2-O5  | 137.3 (2)  |
| Gd1-O1A     | 2.289 (6)   | O8-Gd1-O2A  | 133.03 (18) | O4-Gd2-O7A | 87.7 (3)   |
| Gd1-O8      | 2.337 (6)   | O2-Gd1-O2A  | 75.8 (3)    | O5-Gd2-O7A | 78.6 (2)   |
| Gd1-O2      | 2.378 (6)   | O10-Gd1-O2A | 62.80 (15)  | O4-Gd2-O8  | 84.3 (2)   |
| Gd1-O10     | 2.445 (4)   | O5A-Gd1-O6A | 63.9 (2)    | O5-Gd2-O8  | 137.6 (2)  |
| Gd1-O2A     | 2.470 (6)   | O1A-Gd1-O6A | 75.7 (2)    | O7A-Gd2-O8 | 100.0 (2)  |
| Gd1-O6A     | 2.474 (6)   | O8-Gd1-O6A  | 94.6 (2)    | O4-Gd2-O3  | 85.5 (3)   |
| Gd1-N1A     | 2.485 (7)   | O2-Gd1-O6A  | 160.0 (2)   | O5-Gd2-O3  | 93.5 (2)   |
| Gd2-O4      | 2.252 (7)   | O10-Gd1-O6A | 131.1 (2)   | O7A-Gd2-O3 | 159.5 (2)  |
| Gd2-O5      | 2.282 (5)   | O2A-Gd1-O6A | 121.3 (2)   | O8-Gd2-O3  | 98.5 (2)   |
| Gd2-O7A     | 2.336 (6)   | O5A-Gd1-N1A | 98.4 (3)    | O4-Gd2-O2  | 141.3 (2)  |
| Gd2-O8      | 2.338 (5)   | O1A-Gd1-N1A | 71.6 (3)    | O5-Gd2-O2  | 72.90 (19) |
| Gd2-O3      | 2.425 (7)   | O8-Gd1-N1A  | 155.3 (2)   | O7A-Gd2-O2 | 127.8 (2)  |
| Gd2-O2      | 2.486 (6)   | O2-Gd1-N1A  | 98.2 (2)    | O8-Gd2-O2  | 75.47 (18) |
| Gd2-N2      | 2.529 (8)   | O10-Gd1-N1A | 129.6 (2)   | O3-Gd2-O2  | 65.8 (2)   |
| Gd2-O10     | 2.5538 (7)  | O2A-Gd1-N1A | 67.2 (2)    | O4-Gd2-N2  | 70.5 (2)   |
| O1A-Gd1-O2  | 85.1 (2)    | O6A-Gd1-N1A | 81.1 (3)    | O5-Gd2-N2  | 68.0 (2)   |
| O8-Gd1-O2   | 77.6 (2)    | O8-Gd2-O10  | 68.94 (16)  | O7A-Gd2-N2 | 83.7 (2)   |
| O5A-Gd1-O10 | 73.40 (15)  | O3-Gd2-O10  | 126.8 (2)   | O8-Gd2-N2  | 154.4 (2)  |
| O1A-Gd1-O10 | 143.21 (16) | O2-Gd2-O10  | 61.1 (2)    | O3-Gd2-N2  | 75.8 (2)   |
| O8-Gd1-O10  | 70.88 (15)  | N2-Gd2-O10  | 134.5 (2)   | O2-Gd2-N2  | 122.1 (2)  |
| O2-Gd1-O10  | 64.13 (15)  | O1A-Gd1-O2A | 130.93 (19) | O4-Gd2-O10 | 139.6 (2)  |
| O5A-Gd1-O2A | 73.2 (2)    | O7A-Gd2-O10 | 68.8 (2)    | O5-Gd2-O10 | 71.34 (16) |

Symmetry codes: (A)  $-x+1, y, -z+1/2$ **Table S6.** ICP data of Dy(III) and Y(III) ions in **1·Dy<sub>0.42</sub>Y<sub>3.58</sub>** and **2·Dy<sub>0.27</sub>Y<sub>3.73</sub>**.

| Compounds                                  | Dy (µg / L) | Y (µg / L) | C <sub>Dy:Y</sub> (mol / L) |
|--------------------------------------------|-------------|------------|-----------------------------|
| <b>1·Dy<sub>0.42</sub>Y<sub>3.58</sub></b> | 341.250     | 1591.417   | 0.42:3.58                   |
| <b>2·Dy<sub>0.27</sub>Y<sub>3.73</sub></b> | 219.375     | 1658.097   | 0.27:3.73                   |

**Table S7.** The stability of some typical coordination compounds in different concentration of acid and/or alkali media.

| Coordination Compounds                                                                                                                 | Dimension | Medium and Concentration                             | Temperature / °C | Time / h | Ref.      |
|----------------------------------------------------------------------------------------------------------------------------------------|-----------|------------------------------------------------------|------------------|----------|-----------|
| <b>2</b>                                                                                                                               | 0 D       | NaOH (2 M, 18 M)                                     | 50, RT           | 24, 48   | This work |
| <b>2</b>                                                                                                                               | 0 D       | pH (2.5-14)                                          | RT               | 168      | This work |
| <b>1</b>                                                                                                                               | 0 D       | pH (2.5-14)                                          | RT               | 168      | This work |
| Hf <sub>13</sub> (μ <sub>4</sub> -O) <sub>8</sub> (OCH <sub>3</sub> ) <sub>36</sub>                                                    | 0 D       | HNO <sub>3</sub> (10 M), NaOH (20 M)                 | RT, 100          | 5, 2     | 1         |
| [Zn <sub>5</sub> (H <sub>2</sub> L <sup>n</sup> ) <sub>6</sub> ](NO <sub>3</sub> ) <sub>4</sub> ·8H <sub>2</sub> O·2CH <sub>3</sub> OH | 0 D       | HCl (12 M), NH <sub>3</sub> ·H <sub>2</sub> O (14 M) | Refluxed         | 24       | 2         |
| PTC-184-193                                                                                                                            | 0 D       | pH (1)                                               | RT               | 168      | 3         |
| PTC-184, -185, -188, -189, -190                                                                                                        | 0 D       | pH (13)                                              | RT               | 168      | 3         |
| TMA <sub>8</sub> Ti <sub>2</sub> Ta <sub>8</sub> O <sub>28</sub> ·21H <sub>2</sub> O                                                   | 0 D       | pH (7.5-12)                                          | NG               | NG       | 4         |
| TMA <sub>10</sub> Ti <sub>12</sub> Ta <sub>6</sub> O <sub>44</sub> ·39H <sub>2</sub> O                                                 | 0 D       | pH (7-11)                                            | NG               | NG       | 4         |
| SLUG-34                                                                                                                                | 1 D       | pH (2, 4)                                            | NG               | 12       | 5         |
| [Fe <sup>II</sup> L(H <sub>2</sub> O)]·2H <sub>2</sub> O                                                                               | 1 D       | pH (1, 13)                                           | NG               | 24       | 6         |
| [Eu <sub>2</sub> (tpbpc) <sub>4</sub> ·CO <sub>3</sub> ·4H <sub>2</sub> O]·DMF·solvent                                                 | 1 D       | pH (3-13)                                            | NG               | 240      | 7         |
| {[Tb(H <sub>2</sub> O)(L)(TPA)]·0.5H <sub>2</sub> O} <sub>n</sub>                                                                      | 1 D       | pH (2-12)                                            | NG               | 24       | 8         |
| [Mg(ATDC)(H <sub>2</sub> O) <sub>2</sub> ] <sub>n</sub>                                                                                | 2 D       | pH (1-12)                                            | RT               | 10       | 9         |
| {Na[Zn <sub>1.5</sub> (μ <sub>4</sub> -O)(L)]} <sub>n</sub>                                                                            | 2 D       | pH (1-13)                                            | NG               | 12       | 10        |
| [Cu <sub>2</sub> I <sub>2</sub> (BPEA)](DMF) <sub>4</sub>                                                                              | 2 D       | pH (2-13)                                            | NG               | 24       | 11        |
| {[Ln <sub>3</sub> (μ <sub>6</sub> -CO <sub>3</sub> )(μ <sub>3</sub> -OH) <sub>6</sub> ]OH} <sub>n</sub><br>(Ln = Gd, Tb, Dy)           | 3 D       | HCl (0.1 M), NaOH (20 M)                             | NG               | 6, 72    | 12        |
| PCN-601                                                                                                                                | 3 D       | HCl(0.1 mM), NaOH (20 M)                             | RT, 100          | 24       | 15        |
| PCN-222(Fe)                                                                                                                            | 3 D       | HCl (12M)                                            | NG               | 24       | 14        |
| ZIF-8                                                                                                                                  | 3 D       | NaOH (8 M)                                           | 100              | 24       | 15        |
| PCN-223                                                                                                                                | 3 D       | HCl (1 M), pH (10)                                   | NG               | 24       | 16        |

|                                                                                          |     |                 |    |     |    |
|------------------------------------------------------------------------------------------|-----|-----------------|----|-----|----|
| [EuCd <sub>2</sub> (Pbc) <sub>4</sub> (Meimdc)(H <sub>2</sub> O)]·3H <sub>2</sub> O      | 3 D | pH (2-11)       | NG | 48  | 17 |
| HZIF-1Mo                                                                                 | 3 D | pH (1-14)       | NG | 168 | 18 |
| [Tb(pddb)phen(ox) <sub>0.5</sub> ] <sub>n</sub>                                          | 3 D | pH (4-11)       | NG | 120 | 19 |
| HENU-1                                                                                   | 3 D | pH (1-12)       | NG | 24  | 20 |
| JLU-MOF58                                                                                | 3 D | pH (1-9)        | NG | 72  | 21 |
| SCNU-Z1-C1                                                                               | 3 D | pH (4-10)       | NG | 30  | 22 |
| {[Zn <sub>2</sub> (XN) <sub>2</sub> (IPA) <sub>2</sub> ]·2H <sub>2</sub> O} <sub>n</sub> | 3 D | pH (1-14)       | NG | 6   | 23 |
| (H <sub>3</sub> O)[Zn <sub>3</sub> (OH)(4-cpz) <sub>3</sub> ]·2(DEF)·H <sub>2</sub> O    | 3 D | pH (1-3, 12-14) | NG | 24  | 24 |
| [Zn(L)(H <sub>2</sub> O)]·H <sub>2</sub> O                                               | 3 D | pH (2-11)       | NG | 24  | 25 |

NG: Not Given; H<sub>3</sub>L<sup>n</sup> = (1,2-bis-(benzo[d]imidazol-2-yl)-ethenol (Ref. 2); TMA = Tetramethylammonium; H<sub>2</sub>L = 2,6-bis[3-(pyrazin-2-yl)-1,2,4-triazolyl] pyridine (Ref. 6); Htpbpc = 4'-[4,2';6',4'']-terpyridin-4'-yl-biphenyl-4-carboxylic acid; L = butanedioate (Ref. 8), TPA = 6-(1H-1,2,4-triazol-1-yl)pyridine-2-carboxylate; H<sub>2</sub>ATDC = 2'-amino-1,1':4',1''-terphenyl- 4,4''-dicarboxylate; H<sub>2</sub>L = 6,6-dimethyl-3-oxabicyclo[3.1.0]hexane-2,4-dione (Ref. 10); BPEA = 9,10-bis(pyridin-4-ylethynyl)-anthracene; HPbc = 4-(4-pyridinyl)benzoic acid; H<sub>3</sub>Meimdc = 2-methyl-1H-4,5-imidazole-dicarboxylic acid; H<sub>2</sub>pddb = 4,4'-(pyridine-2,6-diyl)-dibenzoic acid; phen = 1,10-phenanthroline; ox = oxalate; XN = 4'-(4-pyridine)4,2':2',4''-terpyridine; IPA = isophthalic acid, 4-cpz = 4-carboxypyrazole; H<sub>2</sub>L = 5-(2-methylpyridin-4-yl)isophthalic acid (Ref. 25).

## Computational details of **1** and **2**

For the large molecular structures of complexes **1** and **2**, we simplified them on the basis of X-ray determined geometry but didn't perform geometry optimization (Fig. S29). Considering the symmetries of **1** and **2**, we only need to calculate two types of **Dy1** and **Dy2** fragments shown in Figure S33 for each of them. Complete-active-space self-consistent field (CASSCF) calculations on the two types of individual Dy<sup>III</sup> fragments for each complex have been carried out with MOLCAS 8.4<sup>26</sup> program package. Each individual Dy<sup>III</sup> fragment was calculated keeping the experimentally determined structure of the corresponding compound while replacing the nearest neighboring Dy<sup>III</sup> ions by diamagnetic Lu<sup>III</sup>.

The basis sets for all atoms are atomic natural orbitals from the MOLCAS ANO-RCC library: ANO-RCC-VTZP for Dy<sup>III</sup>; VTZ for close N and O; VDZ for distant atoms. The calculations employed the second order Douglas-Kroll-Hess Hamiltonian, where scalar relativistic contractions were taken into account in the basis set and the spin-orbit couplings were handled separately in the restricted active

space state interaction (RASSI-SO) procedure. For individual Dy<sup>III</sup> fragment, active electrons in 7 active orbitals include all *f* electrons (CAS(9 in 7 for Dy<sup>III</sup>)) in the CASSCF calculation. To exclude all the doubts, we calculated all the roots in the active space. We have mixed the maximum number of spin-free state which was possible with our hardware (all from 21 sextets, 128 from 224 quadruplets, 130 from 490 doublets for Dy<sup>III</sup>). SINGLE\_ANISO<sup>27-29</sup> program was used to obtain the energy levels, *g* tensors, magnetic axes, *et al.* based on the above CASSCF/RASSI-SO calculations.

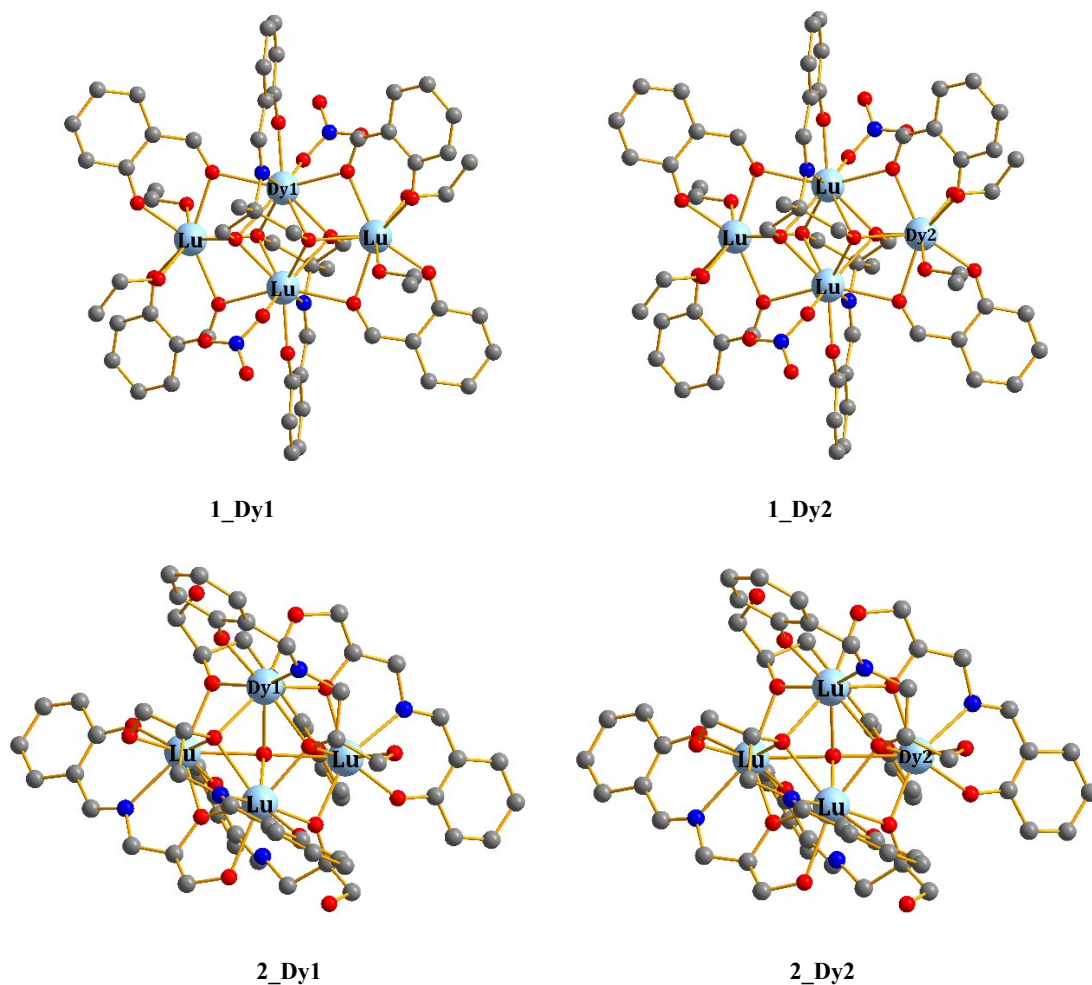

**Fig. S29.** Calculated model structures of individual Dy<sup>III</sup> fragments in complexes **1** and **2**; H atoms are omitted for clarify.

**Table S8.** Calculated energy levels (cm<sup>-1</sup>), *g* (*g<sub>x</sub>*, *g<sub>y</sub>*, *g<sub>z</sub>*) tensors and predominant *m<sub>J</sub>* values of the lowest eight Kramers doublets (KDs) of individual Dy<sup>III</sup> fragments for complexes **1** and **2** using CASSCF/RASSI-SO with MOLCAS 8.4.

| KDs | 1_Dy1 | 1_Dy2 |
|-----|-------|-------|
|-----|-------|-------|

|     | $E/\text{cm}^{-1}$ | $g$                      | $m_J$      | $E/\text{cm}^{-1}$ | $g$                      | $m_J$      |
|-----|--------------------|--------------------------|------------|--------------------|--------------------------|------------|
| 1   | 0.0                | 0.001<br>0.002<br>19.850 | $\pm 15/2$ | 0.0                | 0.637<br>2.630<br>16.736 | $\pm 15/2$ |
| 2   | 194.7              | 0.069<br>0.087<br>17.732 | $\pm 13/2$ | 39.5               | 0.255<br>2.045<br>12.904 | $\pm 9/2$  |
| 3   | 291.2              | 0.551<br>0.666<br>13.961 | $\pm 11/2$ | 109.7              | 2.668<br>4.706<br>9.950  | $\pm 11/2$ |
| 4   | 368.2              | 4.496<br>5.399<br>10.561 | $\pm 9/2$  | 183.1              | 3.588<br>4.634<br>8.704  | $\pm 7/2$  |
| 5   | 417.2              | 0.159<br>2.656<br>10.623 | $\pm 5/2$  | 259.5              | 0.216<br>1.816<br>12.453 | $\pm 3/2$  |
| 6   | 495.0              | 0.811<br>2.540<br>13.405 | $\pm 7/2$  | 339.1              | 0.639<br>1.060<br>15.639 | $\pm 5/2$  |
| 7   | 573.8              | 0.846<br>1.022<br>15.476 | $\pm 3/2$  | 410.2              | 0.120<br>0.190<br>17.932 | $\pm 1/2$  |
| 8   | 641.1              | 0.215<br>0.663<br>18.641 | $\pm 1/2$  | 518.2              | 0.003<br>0.013<br>19.155 | $\pm 13/2$ |
| KDs | <b>2_Dy1</b>       |                          |            | <b>2_Dy2</b>       |                          |            |
|     | $E/\text{cm}^{-1}$ | $g$                      | $m_J$      | $E/\text{cm}^{-1}$ | $g$                      | $m_J$      |



|   |       |                          |            |       |                          |            |
|---|-------|--------------------------|------------|-------|--------------------------|------------|
| 1 | 0.0   | 0.010<br>0.011<br>19.754 | $\pm 15/2$ | 0.0   | 0.154<br>0.380<br>18.953 | $\pm 15/2$ |
| 2 | 124.9 | 0.114<br>0.159<br>16.959 | $\pm 13/2$ | 112.4 | 1.808<br>3.889<br>13.642 | $\pm 13/2$ |
| 3 | 250.9 | 0.577<br>0.923<br>13.254 | $\pm 11/2$ | 189.2 | 0.108<br>4.452<br>9.315  | $\pm 11/2$ |
| 4 | 341.2 | 0.346<br>0.848<br>9.982  | $\pm 9/2$  | 319.6 | 3.988<br>5.691<br>8.858  | $\pm 9/2$  |
| 5 | 401.5 | 2.637<br>6.052<br>9.821  | $\pm 7/2$  | 453.2 | 1.186<br>1.494<br>12.039 | $\pm 3/2$  |
| 6 | 490.7 | 2.109<br>4.015<br>8.435  | $\pm 5/2$  | 602.8 | 0.006<br>0.209<br>15.102 | $\pm 5/2$  |
| 7 | 544.7 | 1.961<br>6.552<br>12.289 | $\pm 1/2$  | 735.7 | 0.042<br>0.173<br>17.582 | $\pm 7/2$  |
| 8 | 685.6 | 0.007<br>0.026<br>19.223 | $\pm 3/2$  | 790.8 | 0.074<br>0.212<br>18.985 | $\pm 1/2$  |

**Table S9.** Wave functions with definite projection of the total moment  $|m_J\rangle$  for the lowest two KDs of individual Dy<sup>III</sup> fragments for complexes **1** and **2**.

|              | $E/\text{cm}^{-1}$ | wave functions                                                                                                                                 |
|--------------|--------------------|------------------------------------------------------------------------------------------------------------------------------------------------|
| <b>1_Dy1</b> | 0.0                | $99.6\% \pm 15/2\rangle$                                                                                                                       |
|              | 80.3               | $75.9\% \pm 13/2\rangle + 18.0\% \pm 11/2\rangle + 5.1\% \pm 9/2\rangle$                                                                       |
| <b>1_Dy2</b> | 0.0                | $67.8\% \pm 15/2\rangle + 13.1\% \pm 11/2\rangle + 4.2\% \pm 13/2\rangle + 4.0\% \pm 3/2\rangle + 2.9\% \pm 5/2\rangle$                        |
|              | 116.6              | $24.1\% \pm 13/2\rangle + 20.7\% \pm 1/2\rangle + 14.6\% \pm 3/2\rangle + 13.9\% \pm 5/2\rangle + 9.5\% \pm 9/2\rangle + 8.8\% \pm 7/2\rangle$ |
| <b>2_Dy1</b> | 0.0                | $97.8\% \pm 15/2\rangle$                                                                                                                       |
|              | 124.9              | $87.0\% \pm 13/2\rangle + 8.0\% \pm 11/2\rangle$                                                                                               |
| <b>2_Dy2</b> | 0.0                | $87.9\% \pm 15/2\rangle + 9.2\% \pm 11/2\rangle$                                                                                               |
|              | 138.8              | $33\% \pm 13/2\rangle + 16.4\% \pm 1/2\rangle + 14.1\% \pm 9/2\rangle + 13.7\% \pm 5/2\rangle + 13\% \pm 3/2\rangle + 6.3\% \pm 7/2\rangle$    |

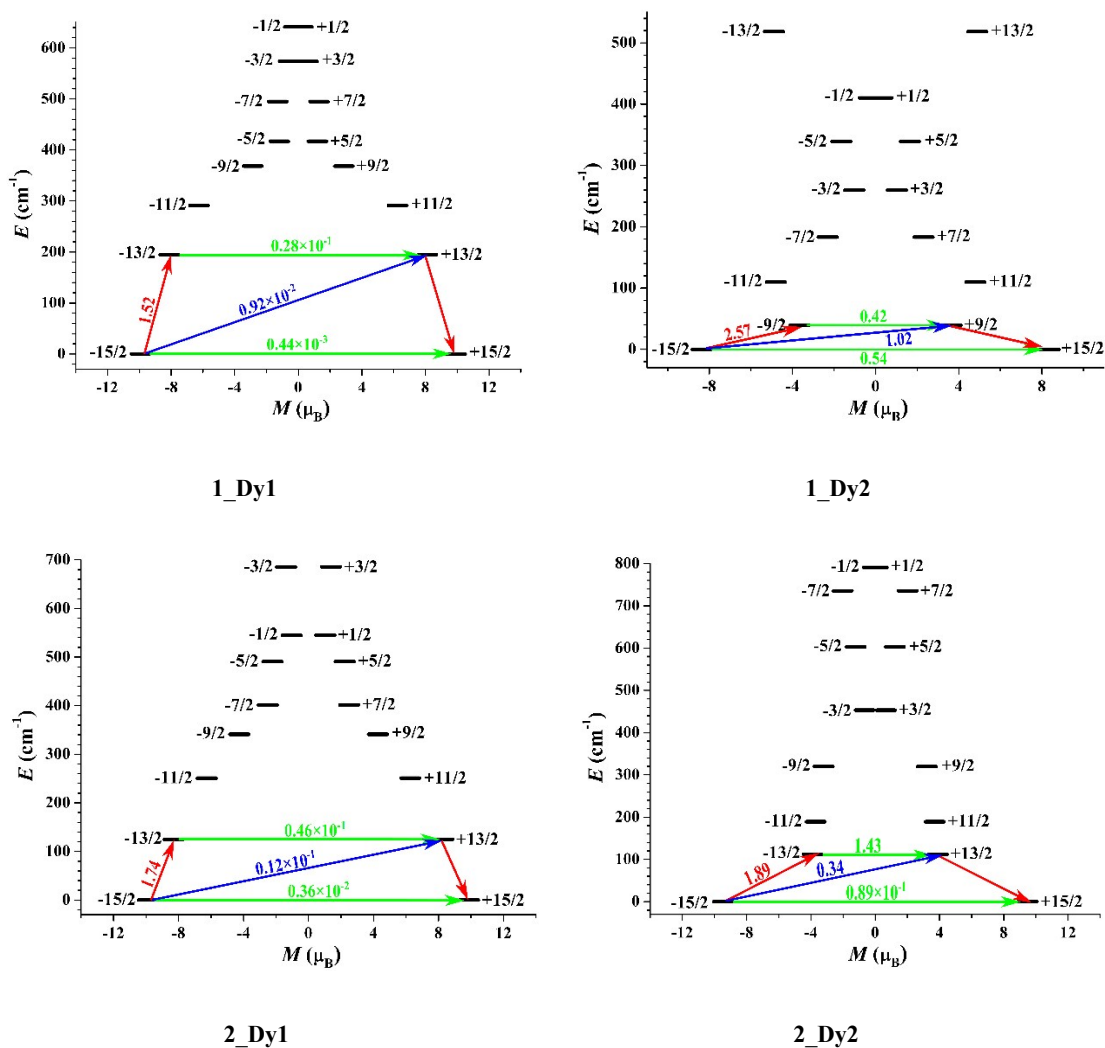

**Fig. S30.** Magnetization blocking barriers of individual  $\text{Dy}^{\text{III}}$  fragments in complexes **1** and **2**. The thick black lines represent the KDs as a function of their magnetic moment along the magnetic axis. The

green lines correspond to diagonal quantum tunneling of magnetization (QTM); the blue line represent off-diagonal relaxation process. The path shown by the red arrows represents the most probable path for magnetic relaxation in the corresponding compounds. The numbers at each arrow stand for the mean absolute value of the corresponding matrix element of transition magnetic moment.

To fit the exchange interactions between Dy<sup>III</sup> ions in complexes **1** and **2**, we took two steps to obtain them. Firstly, we calculated individual Dy<sup>III</sup> fragments using CASSCF/RASSI-SO to obtain the corresponding magnetic properties. Then, the exchange interactions between the magnetic centers were considered within the Lines model,<sup>30</sup> while the account of the dipole-dipole magnetic couplings were treated exactly. The Lines model is effective and has been successfully used widely in the research field of *d* and *f*-elements single-molecule magnets.<sup>31,32</sup>

For complexes **1** and **2**, there are three types of  $\mathcal{J}$ .

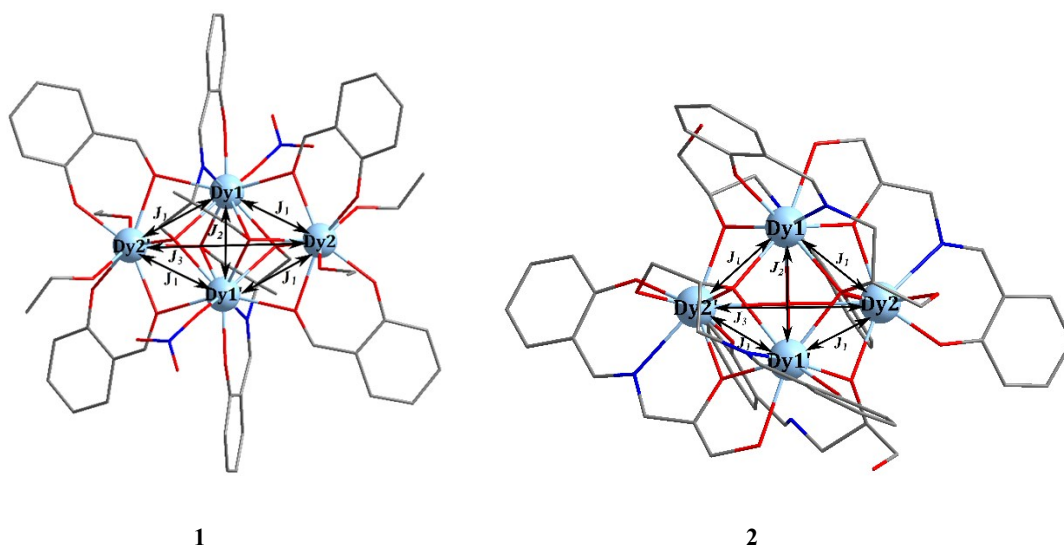

**Fig. S31.** Scheme of the Dy<sup>III</sup>-Dy<sup>III</sup> interactions in complexes **1** and **2**.

The Ising exchange Hamiltonian for **1** and **2** is:

$$H_{exch} = -J_1 \hat{S}_{Dy1} \hat{S}_{Dy2} - J_2 \hat{S}_{Dy1} \hat{S}_{Dy1'} - J_3 \hat{S}_{Dy2} \hat{S}_{Dy2'} \quad (1)$$

The  $J_1 = 25 \cos \varphi J_1$ , where  $\varphi$  is the angle between the anisotropy axes on sites Dy1 and Dy2, and  $J_1$  is the Lines exchange coupling parameter. The other two interactions  $J_2$  and  $J_3$  also have similar expressions. The  $\mathcal{S}_{Dy} = 1/2$  is the ground pseudospin on the Dy<sup>III</sup> site. The total  $\mathcal{J}_{total}$  is the parameter of

the total magnetic interaction ( $\tilde{J}_{total} = \tilde{J}_{dipolar} + \tilde{J}_{exchange}$ ) between magnetic center ions. The dipolar magnetic couplings can be calculated exactly, while the Lines exchange coupling constants were fitted through comparison of the computed and measured magnetic susceptibilities using the POLY\_ANISO program.<sup>27-29</sup>

**Table S10.** Exchange energies  $E$  ( $\text{cm}^{-1}$ ), the energy difference between each exchange doublets  $\Delta_t$  ( $\text{cm}^{-1}$ ) and the main values of the  $g_z$  for the lowest four exchange doublets of complexes **1** and **2**.

|   | <b>1</b> |                       |        | <b>2</b> |                      |        |
|---|----------|-----------------------|--------|----------|----------------------|--------|
|   | $E$      | $\Delta_t$            | $g_z$  | $E$      | $\Delta_t$           | $g_z$  |
| 1 | 0.0      | $0.2 \times 10^{-10}$ | 20.607 | 0.0      | $0.1 \times 10^{-8}$ | 39.472 |
| 2 | 1.3      | $0.1 \times 10^{-9}$  | 39.515 | 1.7      | $0.1 \times 10^{-8}$ | 39.484 |
| 3 | 3.5      | $0.3 \times 10^{-8}$  | 39.503 | 2.4      | $0.3 \times 10^{-9}$ | 26.892 |
| 4 | 3.7      | $0.3 \times 10^{-8}$  | 0.704  | 6.7      | $0.3 \times 10^{-7}$ | 0.074  |

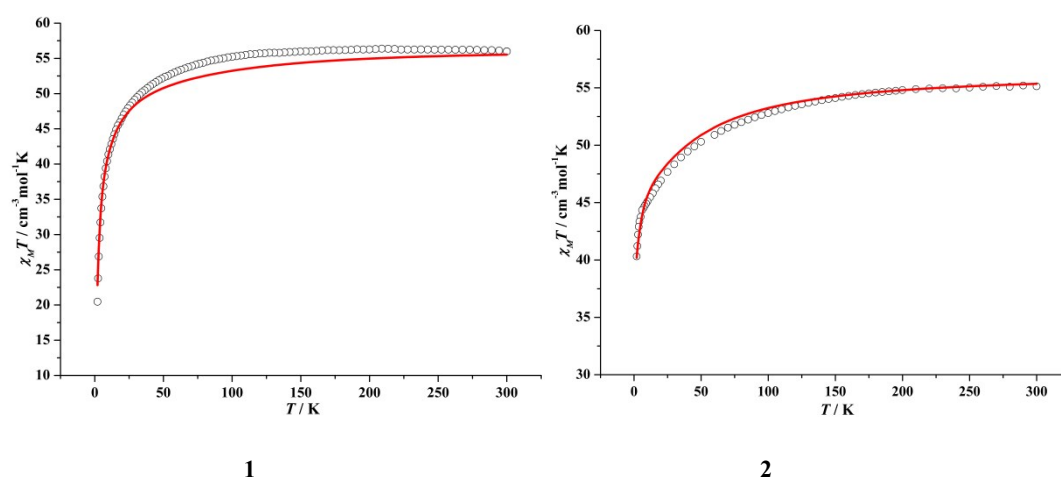

**Fig. S32.** Calculated (red solid line) and experimental (white circle) data of magnetic susceptibilities of complexes **1** and **2**. The intermolecular interactions  $zJ'$  of complexes **1** and **2** were fitted to  $-0.03$  and  $-0.01 \text{ cm}^{-1}$ , respectively.

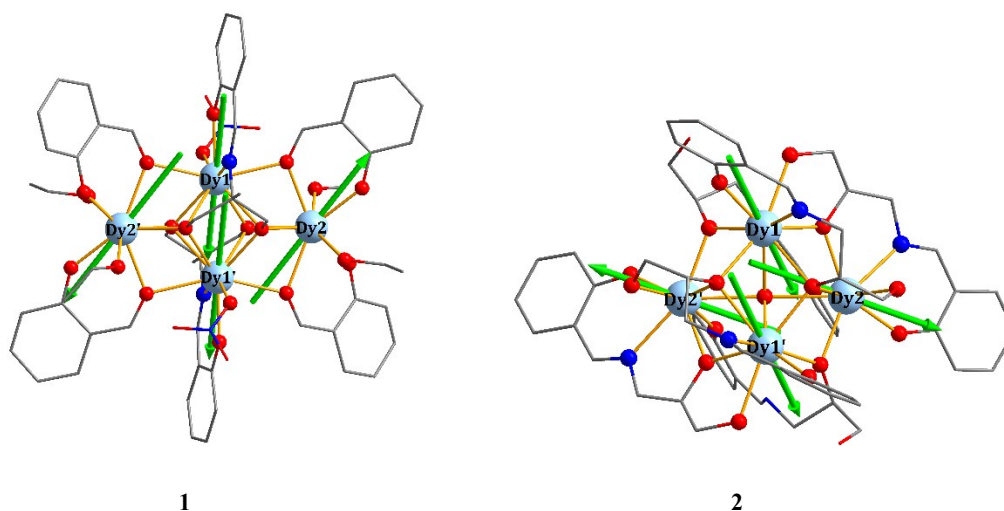

**Fig. S33.** Calculated orientations of the local main magnetic axes on Dy<sup>III</sup> ions of complexes **1** and **2** in the ground KDs.

### References

- [1] X. M. Kang, H.-S. Hu, Z.-L. Wu, J.-Q. Wang, P. Cheng, J. Li, B. Zhao, *Angew. Chem. Int. Ed.*, 2019, **58**, 16610-16616.
- [2] M. H. Zeng, Z. Yin, Z. H. Liu, H. B. Xu, Y.-C. Feng, Y. Hu, X.-C. Chang, Y.-X Zhang, J. Huang, and M. Kurmoo, *Angew. Chem. Int. Ed.*, 2016, **55**, 11407-11411.
- [3] X. Fan, H. Fu, M.-Y. Gao, L. Zhang, and J. Zhang, *Inorg. Chem.*, 2019, **58**, 13353-13359.
- [4] J. H. Son and W. H. Casey, *Chem. Eur. J.*, 2016, **22**, 14155-14157.
- [5] H. Fei, C. S. Han, and S. R. J. Oliver, *Inorg. Chem.*, 2012, **51**, 8655-8657.
- [6] Y. Han, H. Zheng, H. Li, H. Wang, S. M. Wang, Y. Geng, and L. Wang, *RSC Adv.*, 2017, **7**, 5578-5582.
- [7] J. Liu, G. Ji, J. Xiao, and Z. Liu, *Inorg. Chem.*, 2017, **56**, 4197-4205.
- [8] J.-L. Shi, P. Xu, X.-G. Wang, B. Ding, X. J. Zhao, and E. C. Yang, *Z. Anorg. Allg. Chem.*, 2018, **644**, 1598-1606.
- [9] J. S. Hu, S.-J. Dong, K. Wu, X. L. Zhang, J. Jiang, J. Yuan, and M. D. Zheng, *Sens. Actuators B Chem.*, 2019, **283**, 255-261.
- [10] W. Qiao, T. Song, and B. Zhao, *Chin. J. Chem.*, 2019, **37**, 474-478.
- [11] D. M. Chen, C. X. Sun, C. S. Liu, and M. Du, *Inorg. Chem.*, 2018, **57**, 7975-7981.
- [12] J. Dong, P. Cui, P. F. Shi, P. Cheng, and B. Zhao, *J. Am. Chem. Soc.*, 2015, **137**, 15988-15991.
- [13] K. Wang, X. L. Lv, D. Feng, J. Li, S. Chen, J. Sun, L. Song, Y. Xie, J. R. Li, and H. C. Zhou, *J. Am.*

- Chem. Soc.*, 2016, **138**, 914-919.
- [14] D. Feng, Z.-Y. Gu, J. R. Li, H.-L. Jiang, Z. Wei, and H. C. Zhou, *Angew. Chem. Int. Ed.*, 2012, **51**, 10307-10310.
- [15] K. S. Park, Z. Ni, A. P. Côté, J. Y. Choi, R. Huang, F. J. Uribe-Romo, H. K. Chae, M. O'Keeffe, and O. M. Yaghi, *Proc. Natl. Acad. Sci. U. S. A.* 2006, **103**, 10186-10191.
- [16] D. Feng, Z. Y. Gu, Y.-P. Chen, J. Park, Z. Wei, Y. Sun, M. Bosch, S. Yuan, and H. C. Zhou, *J. Am. Chem. Soc.*, 2014, **136**, 17714-17717.
- [17] L. Ding, L. H. Liu, Q. Shi, Y. Q. Sun, Y. J. Wang, and Y. P. Chen, *Inorg. Chem.*, 2017, **56**, 14850-14858.
- [18] Y. Wang, F. Wang, and J. Zhang, *Cryst. Growth Des.*, 2019, **19**, 3430-3434.
- [19] X. L. Qu and B. Yan, *Inorg. Chem.*, 2019, **58**, 524-534.
- [20] D. Li, Q. Xu, Y. Li, Y. Qiu, P. Ma, J. Niu, and J. Wang, *Inorg. Chem.*, 2019, **58**, 4945-4953.
- [21] X. Sun, J. Gu, Y. Yuan, C. Yu, J. Li, H. Shan, G. Li, and Y. Liu, *Inorg. Chem.*, 2019, **58**, 7480-7487.
- [22] S. Q. Deng, X. J. Mo, S. R. Zheng, X. Jin, Y. Gao, S. L. Cai, J. Fan, and W. G. Zhang, *Inorg. Chem.*, 2019, **58**, 2899-2909.
- [23] X.-M. Kang, X. Y. Fan, P. Y. Hao, W. M. Wang, and B. Zhao, *Inorg. Chem. Front.*, 2019, **6**, 271-277.
- [24] H.-R. Fu, F. Wang, and J. Zhang, *Dalton Trans.*, 2015, **44**, 2893-2896.
- [25] X. Y. Guo, F. Zhao, J. J. Liu, Z. L. Liu, and Y. Q. Wang, *J. Mater. Chem. A*, 2017, **5**, 20035-20043.
- [26] F. Aquilante, J. Autschbach, R. K. Carlson, L. F. Chibotaru, M. G. Delcey, L. De Vico, I. Fdez. Galván, N. Ferré, L. M. Frutos, L. Gagliardi, M. Garavelli, A. Giussani, C. E. Hoyer, G. Li Manni, H. Lischka, D. Ma, P. Å. Malmqvist, T. Müller, A. Nenov, M. Olivucci, T. B. Pedersen, D. Peng, F. Plasser, B. Pritchard, M. Reiher, I. Rivalta, I. Schapiro, J. Segarra-Martí, M. Stenrup, D. G. Truhlar, L. Ungur, A. Valentini, S. Vancoillie, V. Veryazov, V. P. Vysotskiy, O. Weingart, F. Zapata, R. Lindh, *J. Comput. Chem.*, 2016, **37**, 506-541.
- [27] L. F. Chibotaru, L. Ungur, A. Soncini, *Angew. Chem. Int. Ed.*, 2008, **47**, 4126-4129.
- [28] L. Ungur, W. Van den Heuvel, L. F. Chibotaru, *New J. Chem.*, 2009, **33**, 1224-1230.
- [29] L. F. Chibotaru, L. Ungur, C. Aronica, H. Elmoll, G. Pilet, D. Luneau, *J. Am. Chem. Soc.*, 2008, **130**, 12445-12455.
- [30] M. E. Lines, *J. Chem. Phys.*, 1971, **55**, 2977-2984.

- [31] K. C. Mondal, A. Sundt, Y. H. Lan, G. E. Kostakis, O. Waldmann, L. Ungur, L. F. Chibotaru, C. E. Anson, A. K. Powell, *Angew. Chem. Int. Ed.*, 2012, **51**, 7550-7554.
- [32] S. K. Langley, D. P. Wielechowski, V. Vieru, N. F. Chilton, B. Moubaraki, B. F. Abrahams, L. F. Chibotaru, K. S. Murray, *Angew. Chem. Int. Ed.*, 2013, **52**, 12014-12019.
